# Supplementary material for: Mechanochemical synthesis of (4S)-N-alkyl-4,5-bis-sulfooxypentanamideviaa one-pot sequential aminolysis-sulfation reaction of (S)-γ-hydroxymethyl-γ-butyrolactone (2H-HBO)
Source: Royal Society of Chemistry journal article supplement (doi:10.1039/d2gc01345b), 2022-01-01

Supporting information

**Mechanochemical synthesis of (4S)-N-alkyl-4,5-bis-sulfooxypentanamide via a one-pot sequential aminolysis-sulfation reaction of (S)- $\gamma$ -hydroxymethyl- $\gamma$ -butyrolactone (2H-HBO)**

Chloé Herrlé,<sup>a</sup> Sylvestre Toumieux,<sup>a</sup> Maryne Araujo,<sup>a</sup> Aurélien Peru,<sup>b</sup> Florent Allais,<sup>b</sup> and Anne Wadouachi<sup>\*a</sup>

<sup>a</sup> *Laboratoire de Glycochimie, des Antimicrobiens et des Agroressources UMR CNRS 7378, Institut de Chimie de Picardie, Université de Picardie Jules Verne, 33 rue Saint Leu, F-80039 Amiens Cédex, France*

<sup>b</sup> *URD Agro-Biotechnologies Industrielles (ABI), CEBB, AgroParisTech, 51110, Pomacle, France*

*Correspondance email : anne.wadouachi@u-picardie.fr*

Contents :

|    |                                                                                                    |     |
|----|----------------------------------------------------------------------------------------------------|-----|
| 1- | General information                                                                                | S2  |
| 2- | General procedure for aminolysis of 2H-HBO ( <b>1</b> ) in a ball mill                             | S2  |
| 3- | Procedure for sulfatation of (4S)-N-alkyl-4,5-dihydroxypentanamide derivatives <b>2a-f</b>         | S2  |
| 4- | Procedure synthesis of (4S)-N-alkyl-4,5-bis-sulfooxypentanamide <b>4b-e</b> in solvent media       | S2  |
| 5- | Procedure for one-pot sequential synthesis of (4S)-N-alkyl-4,5-bis-sulfooxypentanamide <b>4b-e</b> | S3  |
| 6- | Physical data of compounds                                                                         | S3  |
| 7- | Green chemistry metrics                                                                            | S6  |
| 8- | Procedure for CMC determination and graphics                                                       | S9  |
| 9- | NMR spectra                                                                                        | S11 |

### 1- General information

All experiments were carried out in a commercial planetary ball mill Pulverisette 7 Premium 7 Line (Fritsch, Germany), equipped with two jars (20 mL) containing each 80 balls of 5 mm of diameter, the material of these bowls is zirconium oxide or stainless steel. All chemicals were purchased from Merck or Acros suppliers and used without further purification. The (S)- $\gamma$ -hydroxymethyl- $\gamma$ -butyrolactone (2H-HBO) (**1**) was furnished by the URD ABI (Pomacle). Reactions were monitored using Macherey-Nagel TLC Silica gel 60 F254 or Silica gel C18 F254. Products were revealed by charring with cerium molybdate reagent. High-resolution electrospray mass spectrometry (ESI-HRMS) was operated on a Synapt G2-Si Q-TOF high resolution hybrid Mass Spectrometer provided with an electrospray (ESI) ionization source (Waters, Manchester, UK). Data acquisition and processing were performed with MassLynx software (V4.2, Waters). NMR analysis were performed on a spectrometer Bruker operating at 400 MHz for  $^1\text{H}$  and 100 MHz  $^{13}\text{C}$ . NMR samples of (4S)-N-alkyl-4,5-dihydroxypentanamides **2a-f** were prepared in  $\text{CD}_3\text{OD}$ , DMSO- $d_6$  or pyridine- $d_5$ , their sulfated derivatives **4e-f** were dissolved in  $\text{D}_2\text{O}$ . Infrared spectra were obtained using a Fourier-transform infrared (FT-IR) spectrometer (IRaffinity-1S, Shimadzu) and ATR method (MIRacle 10, shimadzu). Optical rotations were measured by an Anton Paar MCP 100 polarimeter at 20 or 25 °C with MeOH or  $\text{H}_2\text{O}$  as solvent (concentration  $c$  given as  $\text{g}\cdot 100\text{ mL}^{-1}$ ). Melting points were determined using a Stuart SMP10. Critical Micelle Concentration (CMC) of the selected molecules were determined with a TC1 tensiometer (Lauda Scientific) using the Du Noüy ring method.

### 2- Procedure of aminolysis of (S)- $\gamma$ -hydroxymethyl- $\gamma$ -butyrolactone **1** (2H-HBO) for synthesis of derivatives **2a-f** and **2g-j**

2H-HBO (**1**) (1 eq.) and primary alkylamine (1 eq.) or secondary amine (1-4 eq.) were added in a stainless steel or zirconia jar (20 mL) containing 80 stainless steel or zirconia balls (diameter = 5 mm) respectively. The jar was flushed with argon and placed in a planetary ball-milling (P7PL) and shaken at 400 rpm in reverse mode for a number of cycles of 5 min (1 min pause between each cycle) depending of the alkylamine (See Table 1 and 2). The reaction was then stopped and the resulting reaction mixture was collected in a minimum of ethanol.

For derivatives **2a-c**, and **2g-j** (See Table 2), silica was added and then ethanol was evaporated. The crude product was then purified by flash chromatography (solid deposit) using a gradient EtOAc/MeOH (100:0 to 75:25) as eluent. The corresponding (4S)-N-alkyl-4,5-dihydroxypentanamide was afforded after evaporation of the solvents under reduced pressure as white solid.

For derivative **2d-f**, the crude product was purified by recrystallization in ethanol. The corresponding (4S)-N-alkyl-4,5-dihydroxypentanamide was afforded after evaporation of the solvents under reduced pressure as white solid.

### 3- Procedure for sulfatation of (4S)-N-alkyl-4,5-dihydroxypentanamide derivatives **2b** and **2e**

Crude (4R) N-alkyl-4,5-dihydroxypentanamide **2b** or **2e** (1 eq.) beforehand synthesized, sulfur trioxide pyridine complex (97 %, 3-8 eq.) and anhydrous AcOEt (LAG,  $\eta = 0.6\text{ }\mu\text{L}/\text{mg}$ ) or NaCl (120 %wt) were added in a zirconia jar (20 mL) containing 80 zirconia balls (diameter = 5 mm) (see Table 3). The jar, flushed with argon, was placed in the P7PL and shaken at 400 or 500 rpm in reverse mode for a number of cycles of 5 minutes (1 min pause between each cycle), optimized for each product (see Table 3). The reaction was then quenched with  $\text{NaHCO}_3$  (8 eq.) by grinding in reverse mode for 3 cycles of 3 min (400 rpm, 1 min pause between each cycle). The crude product (**3b/4b** or **3e/4e**) was directly analyzed by NMR ( $\text{D}_2\text{O}$ ).

### 4- Procedure for synthesis of (4S)-N-alkyl-4,5-bis-sulfooxypentanamide **4b-e** in solvent media

Amide derivatives **2b-e** were prepared by dissolving alkylamine (1.05 eq) in 2-propanol ( $C \approx 0.1\text{ mM}$ ) and added to 2H-HBO (1 eq.) in a round-bottomed flask. The mixture was stirred at 50 °C until TLC showed complete conversion ( $\approx 48\text{ h}$  for compounds **2b** and **2c**) or 24h (compounds **2d** and **2e**). Recrystallization in a minimum of solvent (25% of 2-propanol in acetonitrile for **2b**, 2-propanol for **2c**, Ethanol for **2d** and **2e**) afford pure amide derivatives in 83, 71, 77 and 74% yield respectively for **2b**, **2c**, **2d**, **2e**.

Sulfated products **4b-e** were prepared by adding Sulfur trioxide pyridine complex (2 eq. per OH group) in dry pyridine ( $C \approx 0.1$  mM) at RT until TLC showed complete conversion ( $\approx 48$  h). MeOH (10 eq.) was added and the reaction was stirred 30 min at RT. Sodium hydrogenocarbonate (8 eq.) was then added. Solvents were removed under reduce pressure and the crude product was purified by reverse flash chromatography (C18, 80 g) using H<sub>2</sub>O/MeOH (95:5 to 0:1) as eluent. The products were obtained after evaporation of the solvents under reduced pressure in 60, 59, 71, 73% yield for **4b**, **4c**, **4d**, **4e**, respectively.

#### 5- Procedure for one-pot sequential synthesis of (4S) *N*-alkyl-4,5-bis-sulfooxypentanamide **4b-e**

2H-HBO (**1**) (1 eq.) and alkylamine (1 eq.) were added in a zirconia jar (20 mL) containing 80 zirconia balls (diameter = 5 mm). The jar, flushed with argon, was placed in the P7PL and shaken at 400 in reverse mode for 8, 10, or 11 cycles of 5 min (1 min pause between each cycle) depending of the alkylamine (See Table 3). TLC revealed complete conversion of 2H-HBO. Sulfur trioxide pyridine complex (97%, 4 eq.) and anhydrous AcOEt (LAG,  $\eta = 0.6$   $\mu$ L/mg) were added. The jar was flushed with argon and shaken at 400 or 500 rpm in reverse mode for 16 cycles of 5 minutes (1 min pause between each cycle). The reaction was then quenched with NaHCO<sub>3</sub> (8 eq.) by grinding in reverse mode for 3 cycles of 3 min (400 rpm, 1 min pause between each cycle). The reaction was then stopped and the resulting reaction mixture was collected in minimum of water. Water was evaporated and the crude product was purified by reverse flash chromatography (C18, 80 g) using H<sub>2</sub>O/MeOH (95:5 to 0:1) as eluent. The product was afforded as a white solid after evaporation of the solvents under reduced pressure.

#### 6- Physical datas of compounds

##### (4S)-*N*-decyl-4,5-dihydroxypentanamide **2a**

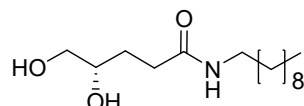

White solid (265.2 mg, 75%).  $R_f = 0.42$  (EtOAc/MeOH 9:1); mp = 96 °C;  $[\alpha]^{20}_D = -9.0^\circ$  ( $C = 0.1$  g/100 mL, MeOH), IR ATR  $\nu_{\max}$  (cm<sup>-1</sup>) = 3294, 2922, 2848, 1631, 1543-1415 cm<sup>-1</sup>

<sup>1</sup>H NMR (400 MHz, CD<sub>3</sub>OD)  $\delta$  (ppm) 3.57 (m, 1H, H<sub>4</sub>), 3.50 – 3.42 (m, 2H, H<sub>5a</sub>, H<sub>5b</sub>), 3.15 (t,  $J = 7.1$  Hz, 2H, CH<sub>2</sub>), 2.39 – 2.23 (m, 2H, H<sub>2a</sub>, H<sub>2b</sub>), 1.83 (m, 1H, H<sub>3a</sub>), 1.63 (m, 1H, H<sub>3b</sub>), 1.55-1.44 (m, 2H, CH<sub>2</sub>), 1.38-1.24 (m, 14H, 7 CH<sub>2</sub>), 0.90 (t,  $J = 6.6$  Hz, 3H, CH<sub>3</sub>). <sup>13</sup>C NMR (101 MHz, CD<sub>3</sub>OD)  $\delta$  (ppm) 176.0 (C<sub>1</sub>), 72.7 (C<sub>4</sub>), 67.1 (C<sub>5</sub>), 40.5 (CH<sub>2</sub>), 33.3 (C<sub>2</sub>), [33.1, 30.7, 30.7] (3 CH<sub>2</sub>), 30.6 (C<sub>3</sub>), [30.5, 30.4, 30.4, 28.0, 23.8] (5 CH<sub>2</sub>), 14.4 (CH<sub>3</sub>). HRMS (ESI):  $m/z$  calculated for C<sub>15</sub>H<sub>31</sub>NNaO<sub>3</sub> 296.2202, found 296.2200 [M+Na]<sup>+</sup>

##### (4S)-*N*-dodecyl-4,5-dihydroxypentanamide **2b**

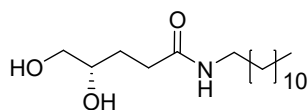

White solid (241.8 mg, 76%).  $R_f = 0.42$  (EtOAc/MeOH 9:1); mp = 102 °C;  $[\alpha]^{20}_D = -7.8^\circ$  ( $C = 0.5$  g/100 mL, MeOH), IR ATR  $\nu_{\max}$  (cm<sup>-1</sup>) = 3299, 2918, 2847, 1632, 1542-1416 cm<sup>-1</sup>

<sup>1</sup>H NMR (400 MHz, CD<sub>3</sub>OD)  $\delta$  (ppm) 3.57 (m, 1H, H<sub>4</sub>), 3.50 – 3.42 (m, 2H, H<sub>5a</sub>, H<sub>5b</sub>), 3.15 (t,  $J = 7.1$  Hz, 2H, CH<sub>2</sub>), 2.39 – 2.23 (m, 2H, H<sub>2a</sub>, H<sub>2b</sub>), 1.83 (m, 1H, H<sub>3a</sub>), 1.62 (m, 1H, H<sub>3b</sub>), 1.54-1.44 (m, 2H, CH<sub>2</sub>), 1.40-1.23 (m, 18H, 9 CH<sub>2</sub>), 0.90 (t,  $J = 6.8$  Hz, 3H, CH<sub>3</sub>). <sup>13</sup>C NMR (101 MHz, CD<sub>3</sub>OD)  $\delta$  (ppm) 176.0 (C<sub>1</sub>), 72.7 (C<sub>4</sub>), 67.1 (C<sub>5</sub>), 40.5 (CH<sub>2</sub>), 33.3 (C<sub>2</sub>), [33.1, 30.8, 30.8, 30.7, 30.7] (5 CH<sub>2</sub>), 30.6 (C<sub>3</sub>), [30.5, 30.4, 30.4, 28.0, 23.7] (5 CH<sub>2</sub>), 14.4 (CH<sub>3</sub>). HRMS (ESI):  $m/z$  calculated for C<sub>17</sub>H<sub>36</sub>NO<sub>3</sub> 302.2695, found 302.2691 [M+H]<sup>+</sup>

##### (4S)-*N*-tetradecyl-4,5-dihydroxypentanamide **2c**

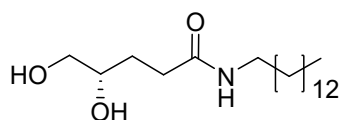

White solid (179.1 mg, 66%).  $R_f = 0.44$  (EtOAc/MeOH 9:1); mp = 104 °C;  $[\alpha]^{20}_D = -2.0^\circ$  (C = 0.05 g/100 mL, MeOH), IR ATR  $\nu_{\max}$  (cm<sup>-1</sup>) = 3301, 2918, 2847, 1633, 1540-1417 cm<sup>-1</sup>  
<sup>1</sup>H NMR (400 MHz, CD<sub>3</sub>OD)  $\delta$ (ppm) 3.57(m, 1H, H<sub>4</sub>), 3.50 – 3.42 (m, 2H, H<sub>5a</sub>, H<sub>5b</sub>), 3.15 (t,  $J = 7.1$  Hz, 2H, CH<sub>2</sub>), 2.39 – 2.23 (m, 2H, H<sub>2a</sub>, H<sub>2b</sub>), 1.83 (m, 1H, H<sub>3a</sub>), 1.62 (m, 1H, H<sub>3b</sub>), 1.53-1.44 (m, 2H, CH<sub>2</sub>), 1.40-1.23 (m, 22H, 11 CH<sub>2</sub>), 0.90 (t,  $J = 6.8$  Hz, 3H, CH<sub>3</sub>).  
<sup>13</sup>C NMR (101 MHz, CD<sub>3</sub>OD)  $\delta$ (ppm) 176.0 (C<sub>1</sub>), 72.7 (C<sub>4</sub>), 67.1 (C<sub>5</sub>), 40.5 (CH<sub>2</sub>), 33.3 (C<sub>2</sub>), [33.1, 30.8, 30.8, 30.8, 30.7, 30.7, 30.7] (7 CH<sub>2</sub>), 30.5 (C<sub>3</sub>), [30.5, 30.4, 30.4, 28.0, 23.7] (5 CH<sub>2</sub>), 14.4 (CH<sub>3</sub>). HRMS (ESI):  $m/z$  calculated for C<sub>19</sub>H<sub>40</sub>NO<sub>3</sub> 330.3008, found 330.3014 [M+H]<sup>+</sup>

**(4S)-N-hexadecyl-4,5-dihydroxypentanamide 2d**

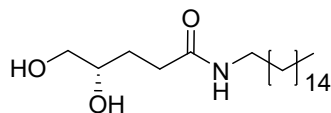

White solid (244.9 mg, 72%).  $R_f = 0.45$  (EtOAc/MeOH 9:1); mp = 108 °C;  $[\alpha]^{20}_D = -24.0^\circ$  (C = 0.1 g/100 mL, MeOH), IR ATR  $\nu_{\max}$  (cm<sup>-1</sup>) = 3296, 2918, 2847, 1632, 1542-1416 cm<sup>-1</sup>  
<sup>1</sup>H NMR (400 MHz, DMSO-*d*<sub>6</sub>)  $\delta$ (ppm) 7.71 (t,  $J = 5.6$  Hz, 1H, NH), 4.48 (d,  $J = 4.8$  Hz, 1H, OH<sub>4</sub>), 4.43 (t,  $J = 5.7$  Hz, 1H, OH<sub>5</sub>), 3.36 (m, 1H, H<sub>4</sub>), 3.29-3.18 (m, 2H, H<sub>5a</sub>, H<sub>5b</sub>), 3.00 (q,  $J = 6.5$  Hz, 2H, CH<sub>2</sub>), 2.17 (m, 1H, H<sub>2a</sub>), 2.07 (m, 1H, H<sub>2b</sub>), 1.67 (m, 1H, H<sub>3a</sub>), 1.43 (m, 1H, H<sub>3b</sub>), 1.46-1.33 (m, 2H, CH<sub>2</sub>), 1.32-1.17 (m, 26H, 13 CH<sub>2</sub>), 0.85 (t,  $J = 6.7$  Hz, 3H, CH<sub>3</sub>).  
<sup>13</sup>C NMR (101 MHz, DMSO-*d*<sub>6</sub>)  $\delta$ (ppm) 172.2 (C<sub>1</sub>), 70.8 (C<sub>4</sub>), 65.7 (C<sub>5</sub>), 38.4 (CH<sub>2</sub>), 31.8 (C<sub>2</sub>), 31.3 (1 CH<sub>2</sub>), 29.5 (C<sub>3</sub>), [29.1, 29.0, 29.00, 28.8, 28.7, 26.4, 22.1] (13 CH<sub>2</sub>), 13.9 (CH<sub>3</sub>). HRMS (ESI):  $m/z$  calculated for C<sub>21</sub>H<sub>44</sub>NO<sub>3</sub> 358.3321, found 358.3311 [M+H]<sup>+</sup>

**(4S)-N-octadecyl-4,5-dihydroxypentanamide 2e**

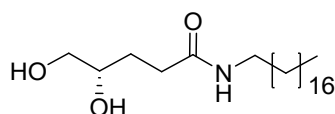

White solid (277.4 mg, 71%).  $R_f = 0.49$  (EtOAc/MeOH 9:1); mp = 110 °C;  $[\alpha]^{20}_D = -16.0^\circ$  (C = 0.05 g/100 mL, MeOH), IR ATR  $\nu_{\max}$  (cm<sup>-1</sup>) = 3299, 2917, 2847, 1632, 1542-1464 cm<sup>-1</sup>  
<sup>1</sup>H NMR (400 MHz, Pyridine-*d*<sub>5</sub>)  $\delta$ (ppm) 8.48 (m, 1H, NH), 6.28 (s, 2H, 2 OH), 4.23 (m, 1H, H<sub>4</sub>), 4.03 – 3.99 (m, 2H, H<sub>5a</sub>, H<sub>5b</sub>), 3.50 (q,  $J = 6.7$  Hz, 2H, CH<sub>2</sub>), 2.87 – 2.78 (m, 2H, H<sub>2a</sub>, H<sub>2b</sub>), 2.44 (m, 1H, H<sub>3a</sub>), 2.26 (m, 1H, H<sub>3b</sub>), 1.62 (q,  $J = 7.3$  Hz, 2H, CH<sub>2</sub>), 1.43-1.17 (m, 30H, 15 CH<sub>2</sub>), 0.88 (t,  $J = 6.8$  Hz, 3H, CH<sub>3</sub>).  
<sup>13</sup>C NMR (101 MHz, Pyridine-*d*<sub>5</sub>)  $\delta$ (ppm) 174.0 (C<sub>1</sub>), 72.9 (C<sub>4</sub>), 67.8 (C<sub>5</sub>), 40.3 (CH<sub>2</sub>), 33.8 (C<sub>2</sub>), 32.6 (1 CH<sub>2</sub>), 31.1 (C<sub>3</sub>), [30.7, 30.5, 30.4, 30.4, 30.4, 30.4, 30.1, 30.1, 27.9, 23.4] (15 CH<sub>2</sub>), 14.7 (CH<sub>3</sub>). HRMS (ESI):  $m/z$  calculated for C<sub>23</sub>H<sub>48</sub>NO<sub>3</sub> 386.3634, found 386.3644 [M+H]<sup>+</sup>

**(4S)-N-nonadecyl-4,5-dihydroxypentanamide 2f**

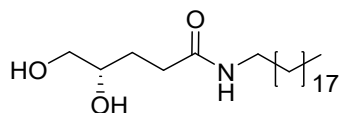

White solid (264.3 mg, 62%).  $R_f = 0.50$  (EtOAc/MeOH 9:1); mp = 112 °C;  $[\alpha]^{20}_D = -36.0^\circ$  (C = 0.05 g/100 mL, MeOH), IR ATR  $\nu_{\max}$  (cm<sup>-1</sup>) = 3255, 2918, 2850, 1662, 1564-1429 cm<sup>-1</sup>  
<sup>1</sup>H NMR (400 MHz, Pyridine-*d*<sub>5</sub>)  $\delta$ (ppm) 8.48 (m, 1H, NH), 6.28 (s, 1H, OH), 6.22 (s, 1H, OH), 4.23 (m, 1H, H<sub>4</sub>), 4.03 – 3.99 (m, 2H, H<sub>5a</sub>, H<sub>5b</sub>), 3.50 (q,  $J = 6.7$  Hz, 2H, CH<sub>2</sub>), 2.89 – 2.76 (m, 2H, H<sub>2a</sub>, H<sub>2b</sub>), 2.43 (m, 1H, H<sub>3a</sub>), 2.25 (m, 1H, H<sub>3b</sub>), 1.62 (q,  $J = 7.2$  Hz, 2H, CH<sub>2</sub>), 1.39-1.21 (m, 30H, 16 CH<sub>2</sub>), 0.88 (t,  $J = 6.7$  Hz, 3H, CH<sub>3</sub>).  
<sup>13</sup>C NMR (101 MHz, Pyridine-*d*<sub>5</sub>)  $\delta$ (ppm) 174.1 (C<sub>1</sub>), 72.9 (C<sub>4</sub>), 67.8 (C<sub>5</sub>), 40.2 (CH<sub>2</sub>), 33.7 (C<sub>2</sub>), 32.6 (1 CH<sub>2</sub>), 31.1 (C<sub>3</sub>), [30.7, 30.5, 30.4, 30.4, 30.4, 30.4, 30.1, 30.1, 27.9, 23.4] (16 CH<sub>2</sub>), 14.7 (CH<sub>3</sub>). HRMS (ESI):  $m/z$  calculated for C<sub>24</sub>H<sub>49</sub>NNaO<sub>3</sub> 422.3610, found 422.3607 [M+Na]<sup>+</sup>

**(4S)-N-dimethyl-4,5-dihydropentanamide 2g**

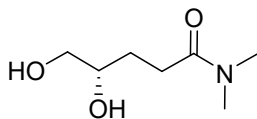

Viscous liquid (111.2 mg, 77%).  $R_f = 0.32$  (EtOAc/MeOH 8:2);  $[\alpha]^{25} = -10.0^\circ$  ( $C = 0.1$  g/100 mL, MeOH), IR ATR  $\nu_{\max} (\text{cm}^{-1}) = 3421, 2937, 1732, 1624, 1506-1406, 1269 \text{ cm}^{-1}$

$^1\text{H}$  NMR (400 MHz,  $\text{CD}_3\text{OD}$ )  $\delta$  (ppm) 3.60 (m, 1H,  $\text{H}_4$ ), 3.51 – 3.43 (m, 2H,  $\text{H}_{5a}, \text{H}_{5b}$ ), 3.08 (s, 3H,  $\text{CH}_3$ ), 2.93 (s, 3H,  $\text{CH}_3$ ), 2.59 – 2.44 (m, 2H,  $\text{H}_{2a}, \text{H}_{2b}$ ), 1.89 – 1.80 (m, 1H,  $\text{H}_{3a}$ ), 1.62 (m, 1H,  $\text{H}_{3b}$ ).  $^{13}\text{C}$  NMR (101 MHz,  $\text{CD}_3\text{OD}$ )  $\delta$  (ppm) 175.6 ( $\text{C}_1$ ), 72.6 ( $\text{C}_4$ ), 67.2 ( $\text{C}_5$ ), 37.8 ( $\text{CH}_3$ ), 35.8 ( $\text{CH}_3$ ), 30.3 ( $\text{C}_2$ ), 29.8 ( $\text{C}_3$ ). HRMS (ESI):  $m/z$  calculated for  $\text{C}_7\text{H}_{15}\text{NNaO}_3$  184.0950, found 184.0956  $[\text{M}+\text{Na}]^+$

**(4S)-N-pyrrolidinyl-4,5-dihydropentanamide 2i**

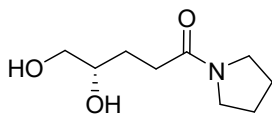

Viscous liquid (151.6 mg, 70%).  $R_f = 0.45$  (EtOAc/MeOH 8:2);  $[\alpha]^{25} = -19.0^\circ$  ( $C = 0.1$  g/100 mL, MeOH), IR ATR  $\nu_{\max} (\text{cm}^{-1}) = 3387, 2877, 1712, 1620, 1454, 1226, 1064 \text{ cm}^{-1}$

$^1\text{H}$  NMR (600 MHz,  $\text{CD}_3\text{OD}$ )  $\delta$  (ppm) 3.60 (m, 1H,  $\text{H}_4$ ), 3.55 – 3.49 (m, 2H,  $\text{H}_{1'a}, \text{H}_{1'b}$ ), 3.48 – 3.44 (m, 2H,  $\text{H}_{5a}, \text{H}_{5b}$ ), 3.41 (t,  $J = 6.9$  Hz, 2H,  $\text{H}_{4'a}$  and  $\text{H}_{4'b}$ ), 2.54 – 2.40 (m, 2H,  $\text{H}_{2a}, \text{H}_{2b}$ ), 2.02 – 1.95 (m, 2H,  $\text{H}_{2'a}, \text{H}_{2'b}$ ), 1.92 – 1.82 (m, 3H,  $\text{H}_{3'a}, \text{H}_{3'b}, \text{H}_{3a}$ ), 1.64 (m, 1H,  $\text{H}_{3b}$ ).  $^{13}\text{C}$  NMR (151 MHz,  $\text{CD}_3\text{OD}$ )  $\delta$  (ppm) 174.1 ( $\text{C}_1$ ), 72.6 ( $\text{C}_4$ ), 67.2 ( $\text{C}_5$ ), 48.0 ( $\text{C}_{1'}$ ), 46.9 ( $\text{C}_{4'}$ ), 31.6 ( $\text{C}_2$ ), 29.6 ( $\text{C}_3$ ), 26.9 ( $\text{C}_{2'}$ ), 25.4 ( $\text{C}_{3'}$ ). HRMS (ESI):  $m/z$  calculated for  $\text{C}_9\text{H}_{17}\text{NNaO}_3$  210.1106, found 210.1116  $[\text{M}+\text{Na}]^+$

**(4S)-N-piperidinyl-4,5-dihydropentanamide 2j**

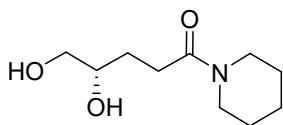

Viscous liquid (86.9 mg, 45%).  $R_f = 0.47$  (EtOAc/MeOH 8:2);  $[\alpha]^{25} = -22.0^\circ$  ( $C = 0.1$  g/100 mL, MeOH), IR ATR  $\nu_{\max} (\text{cm}^{-1}) = 3358, 2937, 2856, 1712, 1614, 1442, 1269, 1066 \text{ cm}^{-1}$

$^1\text{H}$  NMR (400 MHz,  $\text{CD}_3\text{OD}$ )  $\delta$  (ppm) 3.60 (m, 1H,  $\text{H}_4$ ), 3.55 – 3.50 (m, 4H,  $2\text{H}_{1'}, 2\text{H}_{5'}$ ), 3.47 – 3.46 (m, 2H,  $\text{H}_{5a}, \text{H}_{5b}$ ), 2.59 – 2.43 (m, 2H,  $\text{H}_{2a}, \text{H}_{2b}$ ), 1.84 (m, 1H,  $\text{H}_{3a}$ ), 1.68 (m, 2H,  $2\text{H}_{3'}$ ), 1.63 – 1.56 (m, 3H,  $\text{H}_{3b}, 2\text{H}_{4'}$ ), 1.53 (m, 2H,  $2\text{H}_{2'}$ ).  $^{13}\text{C}$  NMR (101 MHz,  $\text{CD}_3\text{OD}$ )  $\delta$  (ppm) 173.7 ( $\text{C}_1$ ), 72.6 ( $\text{C}_4$ ), 67.2 ( $\text{C}_5$ ), 48.0 ( $\text{C}_{1'}$ ), 44.0 ( $\text{C}_{5'}$ ), 30.3 ( $\text{C}_2$ ), 30.1 ( $\text{C}_3$ ), 27.6 ( $\text{C}_{2'}$ ), 26.8 ( $\text{C}_{4'}$ ), 25.5 ( $\text{C}_{3'}$ ). HRMS (ESI):  $m/z$  calculated for  $\text{C}_{10}\text{H}_{19}\text{NNaO}_3$  224.1263, found 224.1268  $[\text{M}+\text{Na}]^+$

**(4S)-N-dodecyl-4,5-bis(sulfooxy)pentanamide, bis sodium salt 4b**

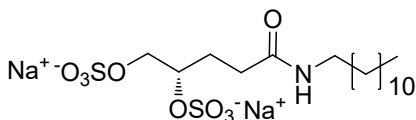

White solid (718.4 mg, 77%).  $R_f = 0.43$  (EtOAc/MeOH 7:3);  $[\alpha]^{20} = -15.4^\circ$  ( $C = 0.5$  g/100 mL,  $\text{H}_2\text{O}$ ), IR ATR  $\nu_{\max} (\text{cm}^{-1}) = 2923, 1644-1464, 1227 \text{ cm}^{-1}$

$^1\text{H}$  NMR (400 MHz,  $\text{D}_2\text{O}$ )  $\delta$  (ppm) 4.58 (m, 1H,  $\text{H}_4$ ), 4.29 (dd,  $J = 10.9, 4.1$  Hz, 1H,  $\text{H}_{5a}$ ), 4.19 (dd,  $J = 10.9, 4.1$  Hz, 1H,  $\text{H}_{5b}$ ), 3.20 (t,  $J = 7.1$  Hz, 2H,  $\text{CH}_2$ ), 2.48 – 2.35 (m, 2H,  $\text{H}_{2a}, \text{H}_{2b}$ ), 2.06 – 2.01 (m, 2H,  $\text{H}_{3a}, \text{H}_{3b}$ ), 1.58-1.49 (m, 2H,  $\text{CH}_2$ ), 1.39-1.272 (m, 18H, 9  $\text{CH}_2$ ), 0.91 (t,  $J = 6.9$  Hz, 3H,  $\text{CH}_3$ ).  $^{13}\text{C}$  NMR (101 MHz,  $\text{D}_2\text{O}$ )  $\delta$  (ppm) 175.3 ( $\text{C}_1$ ), 76.6 ( $\text{C}_4$ ), 68.6 ( $\text{C}_5$ ), 39.4 ( $\text{CH}_2$ ), 31.5 ( $\text{C}_2$ ), [31.2, 28.8, 28.8, 28.6, 28.6, 28.5, 28.3, 28.1] (8  $\text{CH}_2$ ), 27.1 ( $\text{C}_3$ ), [25.9, 22.1] (2  $\text{CH}_2$ ), 13.4 ( $\text{CH}_3$ ). HRMS (ESI):  $m/z$  calculated for  $\text{C}_{17}\text{H}_{33}\text{NNa}_2\text{O}_9\text{S}_2$  528.1290, found 528.1281  $[\text{M}+\text{Na}]^+$

**(4S)-N-tetradecyl-4,5-bis(sulfooxy)pentanamide, bis sodium salt 4c**

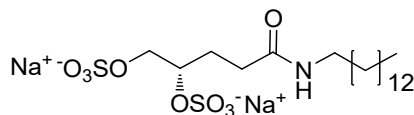

White solid (323.6 mg, 62%).  $R_f = 0.40$  (EtOAc/MeOH 7:3);  $[\alpha]^{20}_D = -13.0^\circ$  ( $C = 0.1$  g/100 mL,  $H_2O$ ), IR ATR  $\nu_{max}$  ( $cm^{-1}$ ) = 2918, 2850, 1647, 1552, 1228, 1074-1045  $cm^{-1}$

$^1H$  NMR (400 MHz,  $D_2O$ )  $\delta$ (ppm) 4.59 (m, 1H,  $H_4$ ), 4.29 (dd,  $J = 11.0, 3.9$  Hz, 1H,  $H_{5a}$ ), 4.18 (dd,  $J = 10.9, 4.2$  Hz, 1H,  $H_{5b}$ ), 3.19 (m, 2H,  $CH_2$ ), 2.47–2.35 (m, 2H,  $H_{2a}, H_{2b}$ ), 2.05–2.00 (m, 2H,  $H_{3a}, H_{3b}$ ), 1.58–1.46 (m, 2H,  $CH_2$ ), 1.41–1.22 (m, 22H, 11  $CH_2$ ), 0.91 (t,  $J = 6.7$  Hz, 3H,  $CH_3$ ).  $^{13}C$  NMR (101 MHz,  $D_2O$ )  $\delta$ (ppm) 174.7 ( $C_1$ ), 76.8 ( $C_4$ ), 68.9 ( $C_5$ ), 39.7 ( $CH_2$ ), 31.9 (1  $CH_2$ ), 31.6 ( $C_2$ ), [29.8, 29.7, 29.7, 29.6, 29.4, 29.3, 28.8] (9  $CH_2$ ), 27.2 ( $C_3$ ), [26.9, 22.6] (2  $CH_2$ ), 13.9 ( $CH_3$ ). HRMS (ESI):  $m/z$  calculated for  $C_{19}H_{37}NNa_3O_9S_2$  556.1603, found 556.1611  $[M+Na]^+$

**(4S)-N-hexadecyl-4,5-bis(sulfooxy)pentanamide, bis sodium salt 4d**

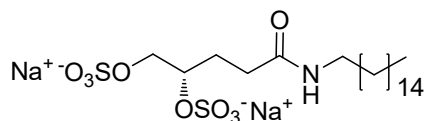

White solid (346.9 mg, 79%).  $R_f = 0.23$  (EtOAc/MeOH 8:2);  $[\alpha]^{20}_D = -8.0^\circ$  ( $C = 0.1$  g/100 mL,  $H_2O$ ), IR ATR  $\nu_{max}$  ( $cm^{-1}$ ) = 2916, 1653, 1548, 1465, 1228, 1074  $cm^{-1}$

$^1H$  NMR (400 MHz,  $D_2O$ )  $\delta$ (ppm) 4.60 (m, 1H,  $H_4$ ), 4.30 (dd,  $J = 11.0, 3.8$  Hz, 1H,  $H_{5a}$ ), 4.18 (dd,  $J = 11.0, 4.3$  Hz, 1H,  $H_{5b}$ ), 3.26–3.15 (m, 2H,  $CH_2$ ), 2.47–2.35 (m, 2H,  $H_{2a}, H_{2b}$ ), 2.03 (q,  $J = 7.4$  Hz, 2H,  $H_{3a}, H_{3b}$ ), 1.59–1.50 (m, 2H,  $CH_2$ ), 1.40–1.25 (m, 26 H, 13  $CH_2$ ), 0.91 (t,  $J = 6.7$  Hz, 3H,  $CH_3$ ).  $^{13}C$  NMR (101 MHz,  $D_2O$ )  $\delta$ (ppm) 174.6 ( $C_1$ ), 76.9 ( $C_4$ ), 68.9 ( $C_5$ ), 39.7 ( $CH_2$ ), 32.0 (1  $CH_2$ ), 31.6 ( $C_2$ ), [30.0, 29.8, 29.8, 29.8, 29.5, 29.4] (10  $CH_2$ ), 28.9 ( $CH_2$ ), 27.2 ( $C_3$ ), [27.0, 22.7] (2  $CH_2$ ), 13.9 ( $CH_3$ ). HRMS (ESI):  $m/z$  calculated for  $C_{21}H_{41}NNa_3O_9S_2$  584.1916, found 584.1898  $[M+Na]^+$

**(4S)-N-octadecyl-4,5-bis(sulfooxy)pentanamide, bis sodium salt 4e**

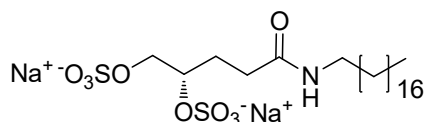

White solid (445.6 mg, 79%).  $R_f = 0.36$  (EtOAc/MeOH 8:2);  $[\alpha]^{20}_D = -7.0^\circ$  ( $C = 0.1$  g/100 mL,  $H_2O$ ), IR ATR  $\nu_{max}$  ( $cm^{-1}$ ) = 2916, 2849, 1651, 1558, 1471, 1233, 1072  $cm^{-1}$

$^1H$  NMR (400 MHz,  $D_2O$ )  $\delta$ (ppm) 4.61 (m, 1H,  $H_4$ ), 4.31 (dd,  $J = 11.0, 3.8$  Hz, 1H,  $H_{5a}$ ), 4.18 (dd,  $J = 11.0, 4.3$  Hz, 1H,  $H_{5b}$ ), 3.21–3.17 (m, 2H,  $CH_2$ ), 2.48–2.36 (m, 2H,  $H_{2a}$  et  $H_{2b}$ ), 2.03 (q,  $J = 7.4$  Hz, 2H,  $H_{3a}, H_{3b}$ ), 1.59–1.50 (m, 2H,  $CH_2$ ), 1.44–1.25 (s, 30H, 15  $CH_2$ ), 0.91 (t,  $J = 6.7$  Hz, 3H,  $CH_3$ ).  $^{13}C$  NMR (101 MHz,  $D_2O$ )  $\delta$ (ppm) 174.6 ( $C_1$ ), 76.9 ( $C_4$ ), 68.9 ( $C_5$ ), 39.7 ( $CH_2$ ), 32.0 (1  $CH_2$ ), 31.6 ( $C_2$ ), [30.0, 30.0, 29.9, 29.9, 29.5, 29.5, 28.9] (13  $CH_2$ ), 27.2 ( $C_3$ ), [27.0, 22.7] (2  $CH_2$ ), 13.9 ( $CH_3$ ). HRMS (ESI):  $m/z$  calculated for  $C_{23}H_{45}NNa_3O_9S_2$  612.2229, found 612.2250  $[M+Na]^+$

**7- Green chemistry metrics.**

To estimate the environmental impact of the one-pot two-step procedure mechanosynthesis in solventless conditions, we calculated some green metrics as described in *ACS Sustainable Chem. Eng.*, **2019**, 7, 19235–19245.

E-factor = [total mass of raw materials minus the total mass of product]/ mass of product

PMI =  $\Sigma$ (mass of stoichiometric reactants)/[mass of product]

RME = mass of product /  $\Sigma$ (mass of stoichiometric reactants)  $\times 100$

$$AE = [\text{MW of product}] \div \Sigma(\text{MW of stoichiometric reactants}) \times 100$$

**Table 1** Mechano-aminolysis of 2H-HBO (**1**) with primary amines-Calcul of green metrics

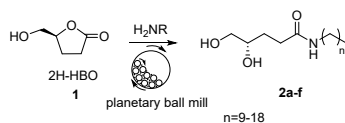

| Entry | RNH <sub>2</sub>                                | MM<br>g.mol <sup>-1</sup> | mass<br>RNH <sub>2</sub> | mass<br>2H-HBO <b>1</b><br>MM 116.12 | Yield %       | MM<br>g.mol <sup>-1</sup> | Mass<br>2a-f | E Factor<br>Ideal value =<br>0 | AE<br>Ideal value =<br>100% | PMI<br>Ideal value =<br>1 | RME<br>Ideal value =<br>100% |
|-------|-------------------------------------------------|---------------------------|--------------------------|--------------------------------------|---------------|---------------------------|--------------|--------------------------------|-----------------------------|---------------------------|------------------------------|
| 1     | C <sub>10</sub> H <sub>21</sub> NH <sub>2</sub> | 157.30                    | 204 mg                   | 150 mg                               | 75% <b>2a</b> | 273.42                    | 265 mg       | <b>0.33</b>                    | <b>100%</b>                 | <b>1.33</b>               | <b>74%</b>                   |
| 2     | C <sub>12</sub> H <sub>25</sub> NH <sub>2</sub> | 185.35                    | 196 mg                   | 123 mg                               | 76% <b>2b</b> | 301.47                    | 242 mg       | <b>0.32</b>                    | <b>100%</b>                 | <b>1.32</b>               | <b>75%</b>                   |
| 3     | C <sub>14</sub> H <sub>29</sub> NH <sub>2</sub> | 213.41                    | 177 mg                   | 96 mg                                | 66% <b>2c</b> | 329.53                    | 179 mg       | <b>0.52</b>                    | <b>100%</b>                 | <b>1.52</b>               | <b>65%</b>                   |
| 4     | C <sub>16</sub> H <sub>33</sub> NH <sub>2</sub> | 241.46                    | 232 mg                   | 111 mg                               | 72% <b>2d</b> | 357.58                    | 245 mg       | <b>0.40</b>                    | <b>100%</b>                 | <b>1.40</b>               | <b>71%</b>                   |
| 5     | C <sub>18</sub> H <sub>37</sub> NH <sub>2</sub> | 269.51                    | 273 mg                   | 117 mg                               | 71% <b>2e</b> | 385.63                    | 277 mg       | <b>0.41</b>                    | <b>100%</b>                 | <b>1.41</b>               | <b>71%</b>                   |
| 6     | C <sub>19</sub> H <sub>39</sub> NH <sub>2</sub> | 283.535                   | 300 mg                   | 123 mg                               | 62% <b>2f</b> | 399.66                    | 264 mg       | <b>0.60</b>                    | <b>100%</b>                 | <b>1.60</b>               | <b>62%</b>                   |

**Table 2** Mechano-aminolysis of 2H-HBO (**1**) with secondary amines

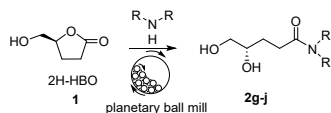

| Entry | Alkylamine <sup>a</sup> /eq.                        | rpm / Time(min) <sup>b</sup> | Product   | Conversion [%] <sup>c</sup> | Yield [%] <sup>d</sup> |
|-------|-----------------------------------------------------|------------------------------|-----------|-----------------------------|------------------------|
| 1     | (CH <sub>3</sub> ) <sub>2</sub> NH /1               | 400 / 71                     | <b>2g</b> | 68                          | NI                     |
| 2     | (CH <sub>3</sub> ) <sub>2</sub> NH /1.5             | 400 / 71                     | <b>2g</b> | 79                          | NI                     |
| 3     | (CH <sub>3</sub> ) <sub>2</sub> NH /4               | 400/ 71                      | <b>2g</b> | >97                         | 77                     |
| 4     | (C <sub>2</sub> H <sub>5</sub> ) <sub>2</sub> NH /1 | 400/ 71<br>then 500 / 23     | <b>2h</b> | 0                           | -                      |
| 5     | pyrrolidine /1                                      | 400/ 71                      | <b>2i</b> | 88                          | 70                     |
| 6     | piperidine/1                                        | 400/ 143                     | <b>2j</b> | 73                          | 38                     |
| 7     | piperidine/2                                        | 400/ 71                      | <b>2j</b> | 91                          | 52                     |

<sup>a</sup> 2H-HBO (1 eq.) and alkylamine (1-4 eq.) in a zirconia jar (20 mL) equipped with 80 zirconia balls of 5 mm diameter were grinded during x cycles in inverse mode in a planetary ball mill. <sup>b</sup> Corresponding to 4, 12 or 24 cycles of 5 min, each cycle is followed by a pause time of 1 min. <sup>c</sup> Corresponding to 4, 12 or 24 cycles of 5 min, each cycle is followed by a pause time of 1 min. <sup>d</sup> Estimated by <sup>1</sup>H NMR (H-4 ratio between **1** and **2**). *E* Isolated by flash chromatography. NI : Not Isolated

**Table 3** Optimization of sulfation reaction in solventless conditions with compound **2b-e**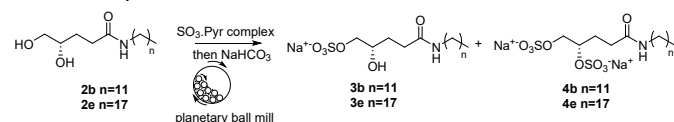

| Entry        | Alkylamide <sup>a</sup> | $\text{SO}_3\cdot\text{Pyr}$ | rpm/Time(min) <sup>b</sup> | Auxiliary <sup>c</sup><br>(eq./OH) | Conversion [%] <sup>e</sup> |
|--------------|-------------------------|------------------------------|----------------------------|------------------------------------|-----------------------------|
| <b>(3/4)</b> |                         |                              |                            |                                    |                             |
| 1            | <b>2b</b>               | 4                            | 400 / 59                   | -                                  | 78 (5:95)                   |
| 2            | <b>2b</b>               | 4                            | 400 / 59                   | NaCl                               | >97 <b>4b</b>               |
| 3            | <b>2b</b>               | 4                            | 400 / 59                   | EtOAc <sup>d</sup>                 | >97 (3:97)                  |
| 4            | <b>2b</b>               | 4                            | 400 / 95                   | NaCl                               | >97 <b>4b</b>               |
| 5            | <b>2b</b>               | 1.5                          | 400 / 95                   | NaCl                               | 83 (7:93)                   |
| 6            | <b>2e</b>               | 2                            | 400 / 95                   | -                                  | 71 (27:73)                  |
| 7            | <b>2e</b>               | 2                            | 500 / 95                   | -                                  | >97 <b>4e</b>               |
| 8            | <b>2e</b>               | 2                            | 200 / 95                   | -                                  | 47 (28:72)                  |
| 9            | <b>2e</b>               | 1                            | 200 / 95                   | -                                  | 41 (29 :71)                 |
| 10           | <b>2e</b>               | 0.5                          | 200 / 95                   | -                                  | 23 (83 :17)                 |

<sup>a</sup> *N*-Alkyl-amide (1 eq.) and  $\text{SO}_3\cdot\text{Pyr}$  complex were grinded in a zirconia jar (20 mL) equipped with 80 zirconia balls of 5 mm diameter in a P7PL Fritsch ball mill. <sup>b</sup> Corresponding to 7, 10 or 16 cycles of 5 min, each cycle is followed by a pause time of 1 min. <sup>c</sup> The amount of NaCl (120%) is calculated comparatively to the total amount of powder. LAG is defined by  $\eta = \text{liquid quantity } (\mu\text{L}) / \text{solid reactants mass (mg)}$ . <sup>d</sup>  $\eta = 2$ . <sup>e</sup> Estimated by  $^1\text{H}$  NMR.

**Table 4** One-pot sequential mechanosynthesis of compounds **4b-e** – Calcul of green metrics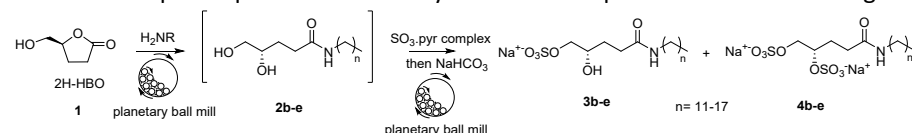

| Entry | $\text{RNH}_2$                          | MM     | m $\text{RNH}_2$ | m <b>1</b><br>MM 116.12 | EtOAc<br>LAG<br>MM 88.11 d 0.9 | $\text{SO}_3\cdot\text{Pyr}$ 97%<br>4eq.<br>MM 159.16 | Yield<br>%       | $\text{NaHCO}_3$<br>8 eq<br>MM 84.01 | MM     | m <b>4b-e</b> | E Factor<br>Ideal<br>value = 0 | AE<br>Ideal<br>value =<br>100 % | PMI<br>Ideal<br>value<br>= 1 | RME<br>Ideal<br>value<br>= 100% |
|-------|-----------------------------------------|--------|------------------|-------------------------|--------------------------------|-------------------------------------------------------|------------------|--------------------------------------|--------|---------------|--------------------------------|---------------------------------|------------------------------|---------------------------------|
| 5     | $\text{C}_{12}\text{H}_{25}\text{NH}_2$ | 185.35 | 341 mg           | 214 mg                  | 0.89 mL / 801 mg<br>4.891 eq.  | 1180 mg<br>4.02 eq.                                   | 77%<br><b>4b</b> | 1240 mg<br>8 eq.                     | 505.55 | 718 mg        | 1.62                           | 79.87%                          | 2.62                         | 38%                             |
| 6     | $\text{C}_{14}\text{H}_{29}\text{NH}_2$ | 213.41 | 209 mg           | 114 mg                  | 0.57 mL / 513 mg<br>5.93 eq.   | 621 mg<br>3.97 eq.                                    | 62%<br><b>4c</b> | 655 mg<br>7.95 eq.                   | 533.60 | 324 mg        | 1.72                           | 80.75%                          | 2.71                         | 37%                             |
| 7     | $\text{C}_{16}\text{H}_{33}\text{NH}_2$ | 241.46 | 189 mg           | 91 mg                   | 0.47 mL / 423 mg<br>6.12 eq.   | 497 mg<br>3.98 eq.                                    | 79%<br><b>4d</b> | 524 mg<br>8 eq.                      | 561.66 | 347 mg        | 1.95                           | 81.53%                          | 2.95                         | 34%                             |
| 9     | $\text{C}_{18}\text{H}_{37}\text{NH}_2$ | 269.51 | 257 mg           | 111 mg                  | 0.59 mL / 531 mg<br>6.3 eq.    | 608 mg<br>3.99 eq.                                    | 79%<br><b>4e</b> | 640 mg<br>8 eq.                      | 589.71 | 446 mg        | 1.58                           | 82.25 %                         | 3.05                         | 33%                             |



## Solvent conditions

### Aminolysis (step 1)

| RNH <sub>2</sub>                                | MM     | m RNH <sub>2</sub><br>1.05 eq. | m 1<br>MM 116.12 | Isopropanol<br>MM 60.01<br>d 0.786 | Yield %       | MM     | m 2a-f | E Factor<br>Ideal value = 0 | AE<br>Ideal value = 100% | PMI<br>Ideal value = 1 | RME<br>Ideal value = 100% |
|-------------------------------------------------|--------|--------------------------------|------------------|------------------------------------|---------------|--------|--------|-----------------------------|--------------------------|------------------------|---------------------------|
| C <sub>12</sub> H <sub>25</sub> NH <sub>2</sub> | 185.35 | 638 mg<br>1 eq.                | 400 mg           | 6.9 ml<br>5.42 g<br>26.2 eq.       | 83% <b>2b</b> | 301.47 | 860 mg | 6.5                         | 100%                     | 7.5                    | 13.3 %                    |
| C <sub>14</sub> H <sub>29</sub> NH <sub>2</sub> | 213.41 | 734 mg<br>1eq.                 | 400 mg           | 6.9 ml<br>5.4 g<br>26,2 eq.        | 71% <b>2c</b> | 329.53 | 807 mg | 7.1                         | 100%                     | 8.1                    | 12.3%                     |
| C <sub>16</sub> H <sub>33</sub> NH <sub>2</sub> | 241.46 | 654 mg<br>1.05 eq              | 300 mg           | 5.2 ml<br>4.1 g<br>26.3 eq.        | 77% <b>2d</b> | 357.58 | 719 mg | 6                           | 100%                     | 7                      | 14,2%                     |
| C <sub>18</sub> H <sub>37</sub> NH <sub>2</sub> | 269.51 | 488 mg<br>1.05 eq.             | 200 mg           | 3.5 ml<br>2.75 g<br>25.3 eq.       | 74% <b>2e</b> | 385.63 | 495 mg | 5.94                        | 100%                     | 6.94                   | 14.4%                     |

### Sulfatation (step 2)

| Entry | Amide     | MM<br>g.mol <sup>-1</sup> | Mass<br>amide<br>mg | Pyridine<br>V mL<br>Mass g<br>MM<br>79.1 | SO <sub>3</sub> .Pyr<br>97%<br>4eq.<br>MM<br>159.16 | NaHCO <sub>3</sub><br>8 eq<br>MM<br>84.01 | MM<br>4b-e | Yield<br>% | Mass<br>4b-e<br>mg | E Factor<br>Ideal value = 0 | AE<br>Ideal value = 100 % | PMI<br>Ideal value = 1 | RME<br>Ideal value = 100% |
|-------|-----------|---------------------------|---------------------|------------------------------------------|-----------------------------------------------------|-------------------------------------------|------------|------------|--------------------|-----------------------------|---------------------------|------------------------|---------------------------|
| 5     | <b>2b</b> | 301.47                    | 769                 | 12.0 mL<br>11.80 g                       | 1.627 g                                             | 1.706 g                                   | 505.55     | 60         | 779<br><b>4b</b>   | 19.4                        | 81%                       | 20.4                   | 4.9%                      |
| 6     | <b>2c</b> | 329.53                    | 605                 | 11.0 mL<br>10.80 g                       | 1.170 g                                             | 1.30 g                                    | 533.60     | 59         | 578<br><b>4c</b>   | 23                          | 81.9%                     | 24                     | 4.16%                     |
| 7     | <b>2d</b> | 357.58                    | 545                 | 9.0 mL<br>8.84 g                         | 970 mg                                              | 1.02 g                                    | 561.66     | 71         | 606<br><b>4e</b>   | 17.8                        | 82.6                      | 18.8                   | 5.3%                      |
| 9     | <b>2e</b> | 385.63                    | 553                 | 14.0 mL<br>13.75 g                       | 913 mg                                              | 903 mg                                    | 589.71     | 73         | 615<br><b>4f</b>   | 25.2                        | 83.3                      | 26.2                   | 3.8%                      |

These metric values are been calculated without considering the work-up step.

## 8- Procedure for CMC determination

CMC determination were realized on a selection of disulfated molecules with potential surfactant properties. First, surfactant solutions at different concentrations were prepared by dissolving a known quantity of synthesized molecule in ultrapure water. The three studied molecules were easily soluble at room temperature. Each solution was then put in a crystallizer. After standing for 30 min (corresponding to the time required to reach the equilibrium surface tension), the surface tension was measured with a TC1 tensiometer (Lauda Scientific) using the Du Noüy ring method. The temperature of surface tension measurement was so maintained at  $25 \pm 1$  °C and all measurements were repeated three times. The surface tension measurements at high concentration were limited due to the available quantity of the surfactants. A concentration-surface tension curve was then obtained and the CMC was determined at the minimum of the break point.

The following curves were obtained. Each point corresponds to the average of three measurements.

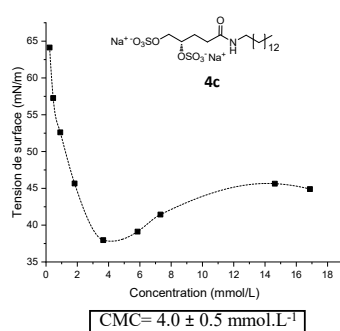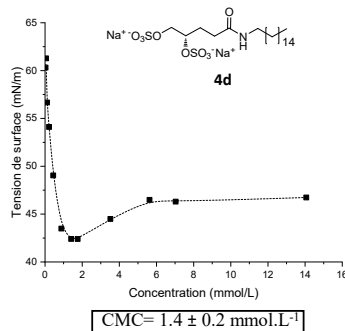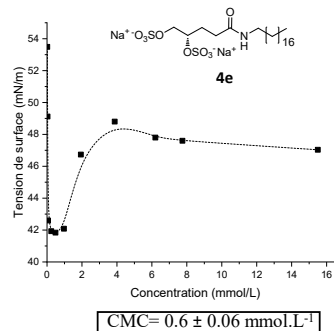

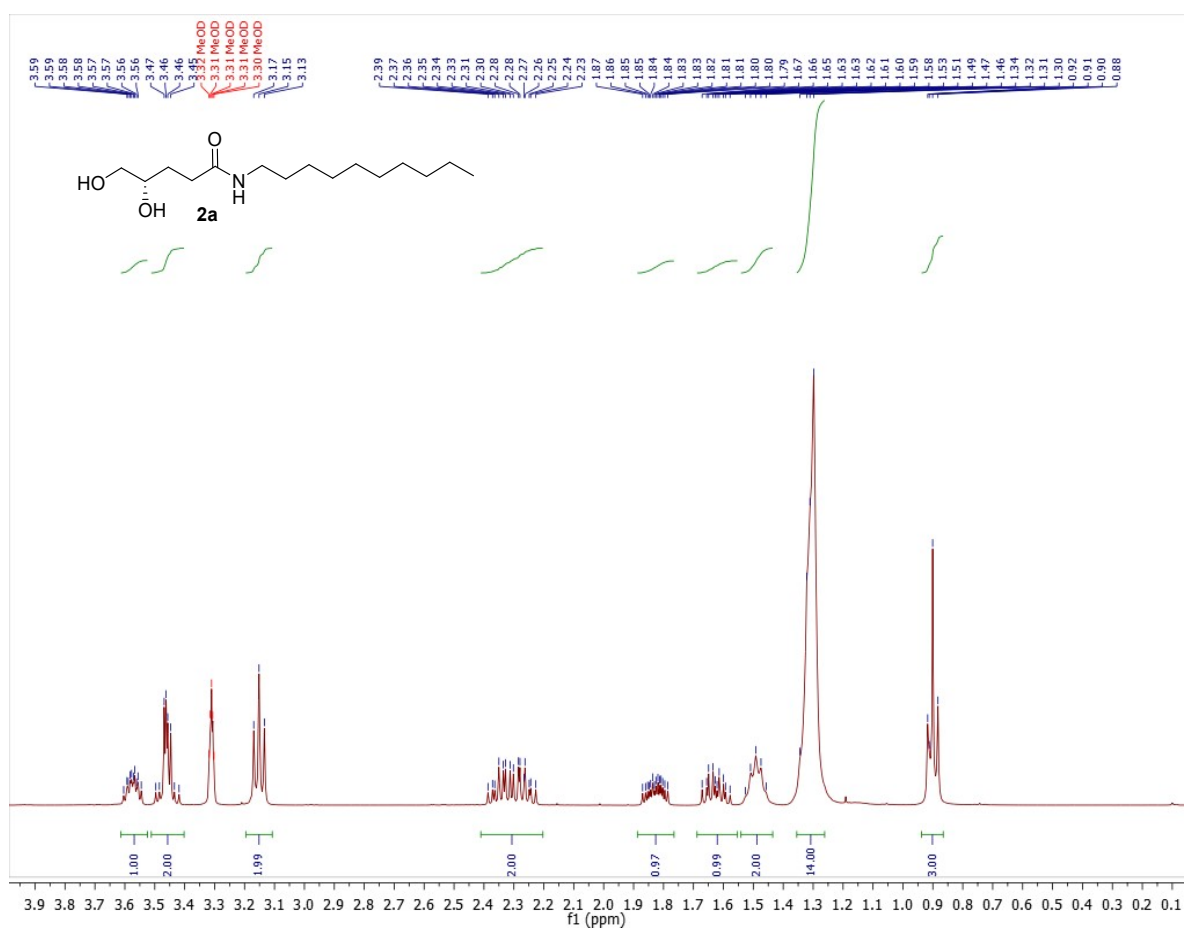

## 8- NMR Spectra

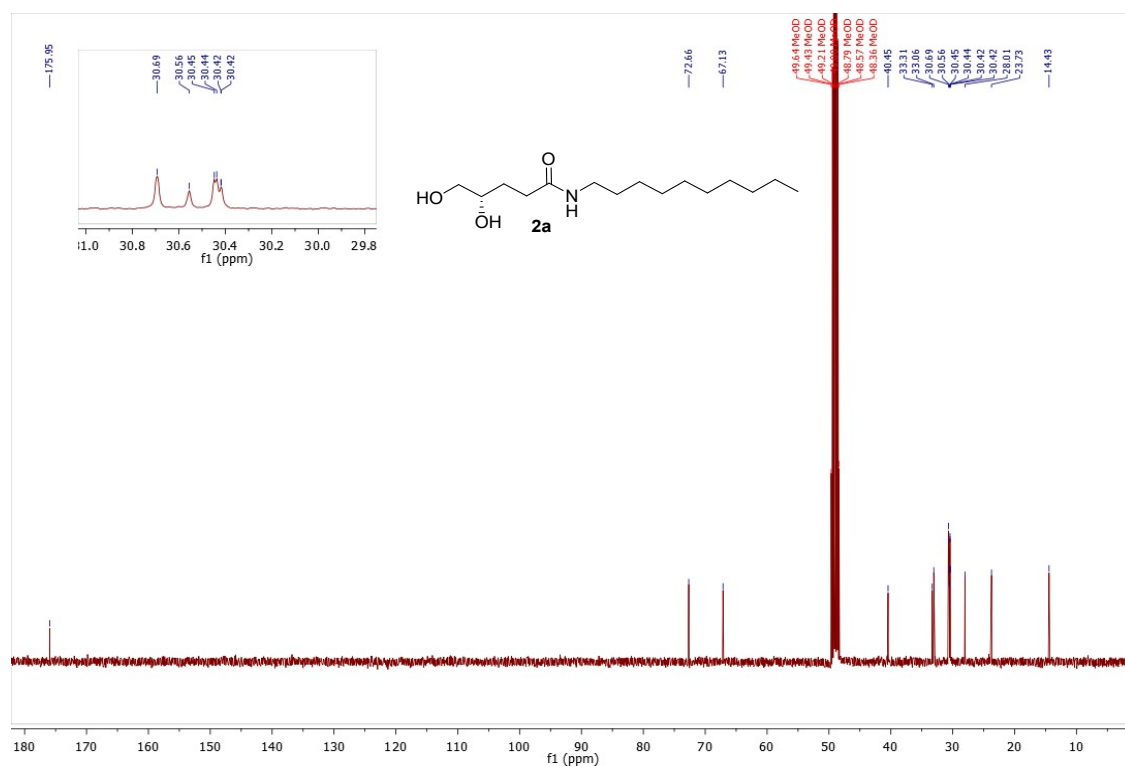

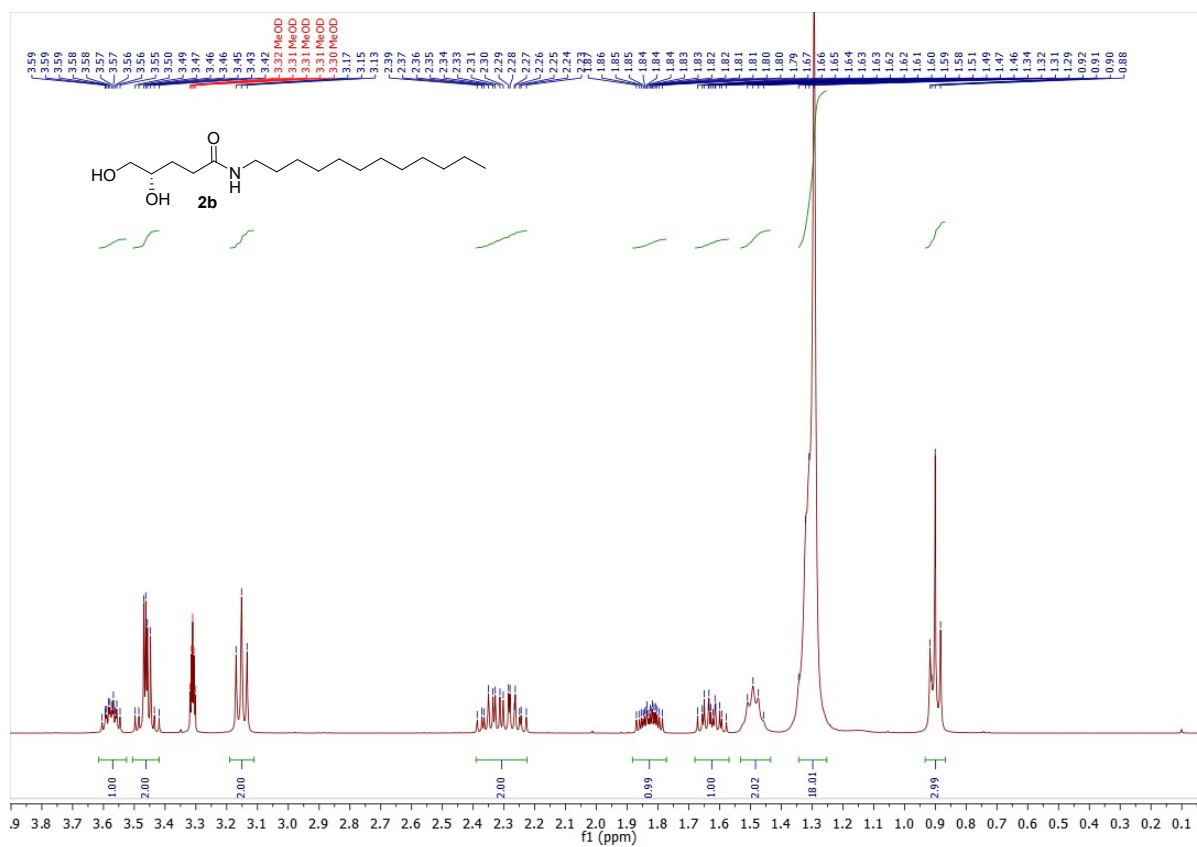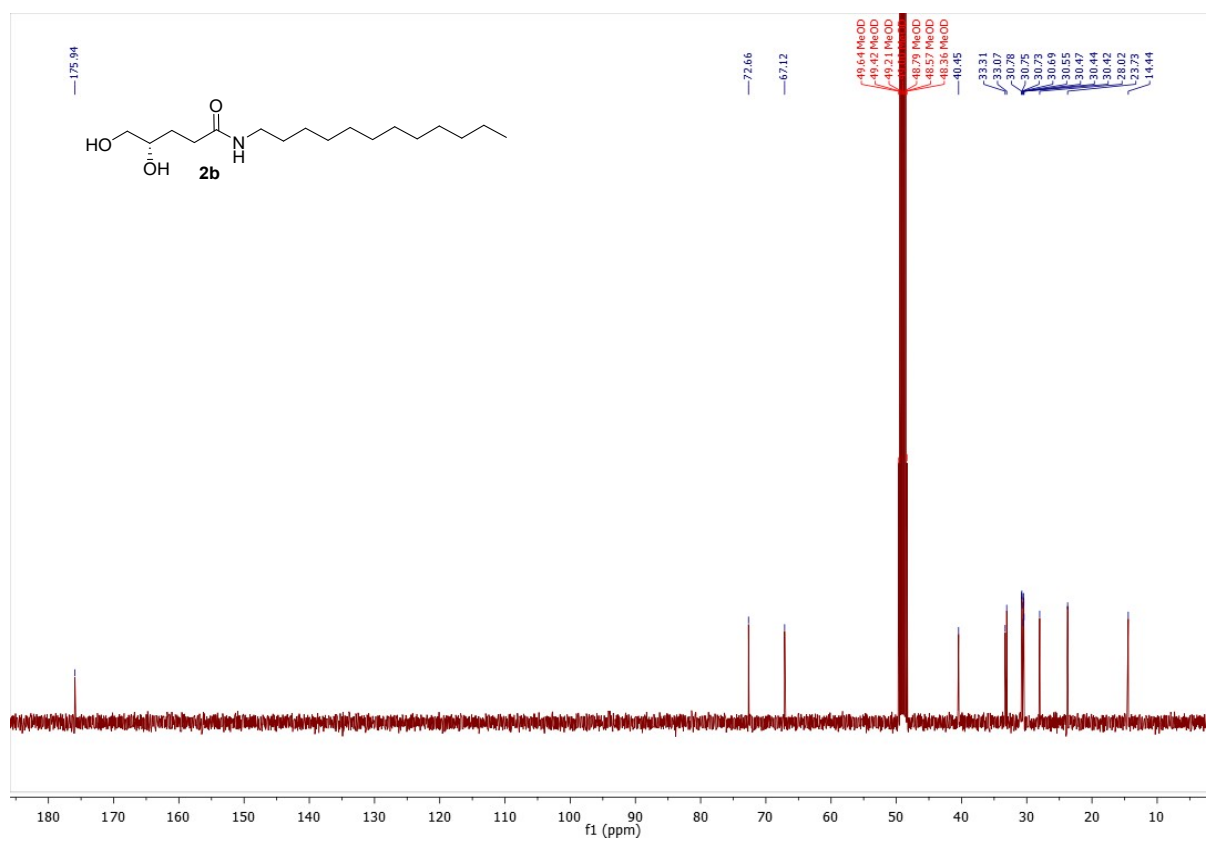

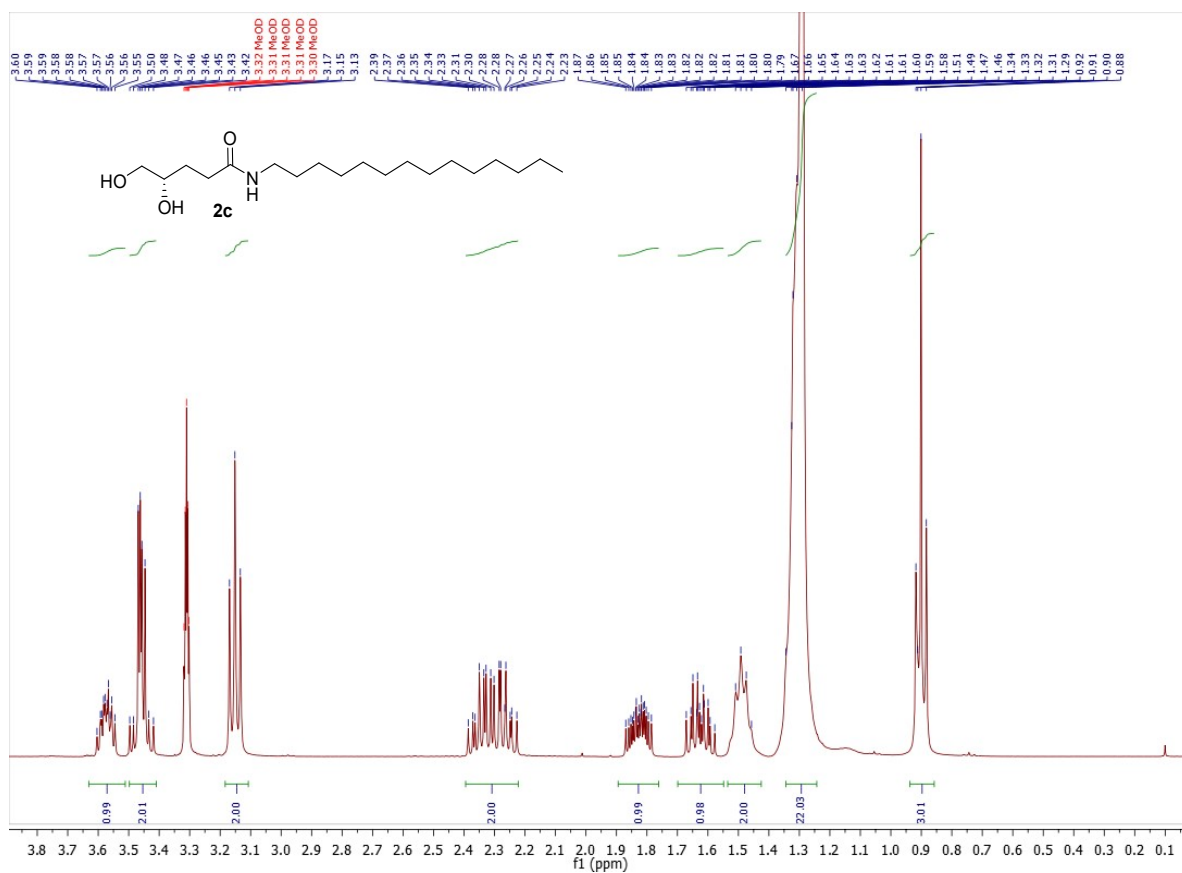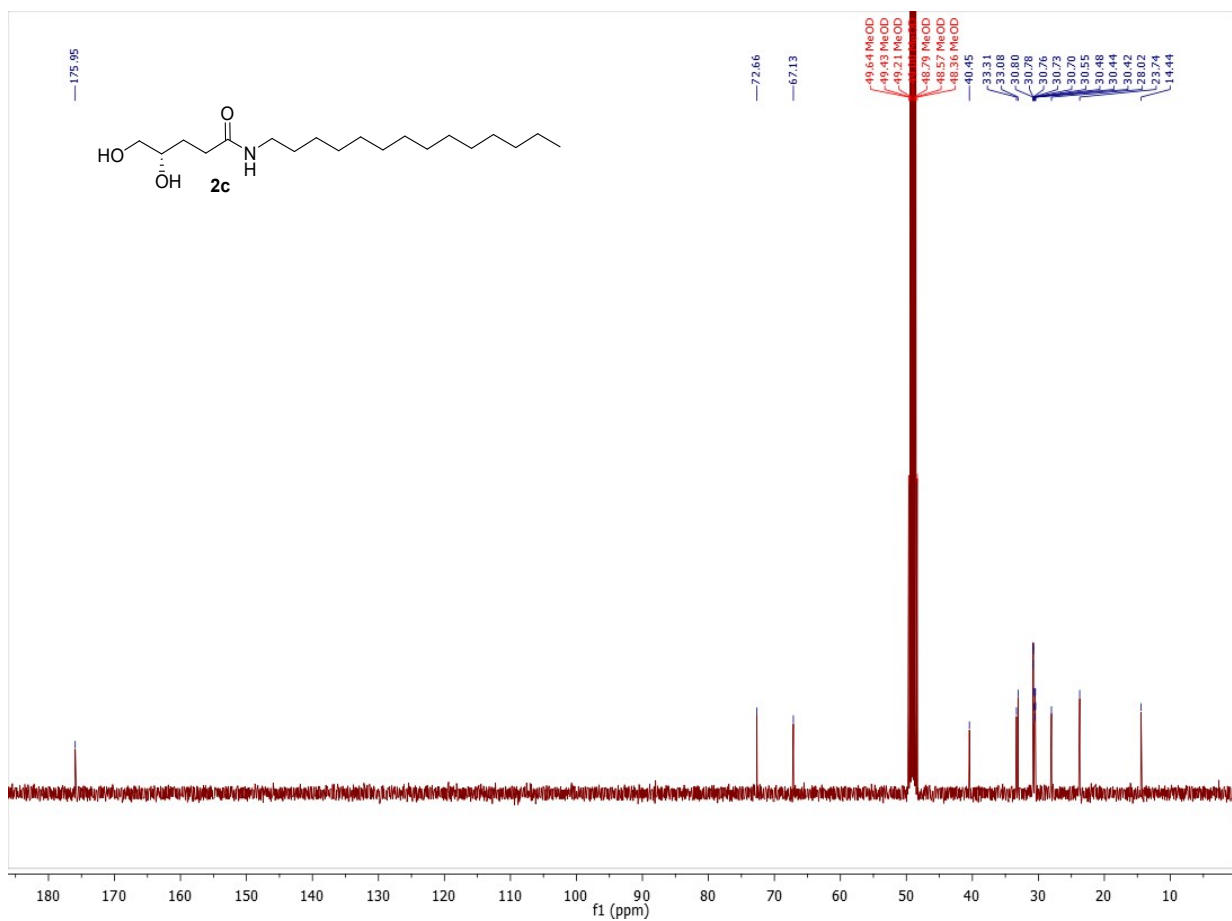

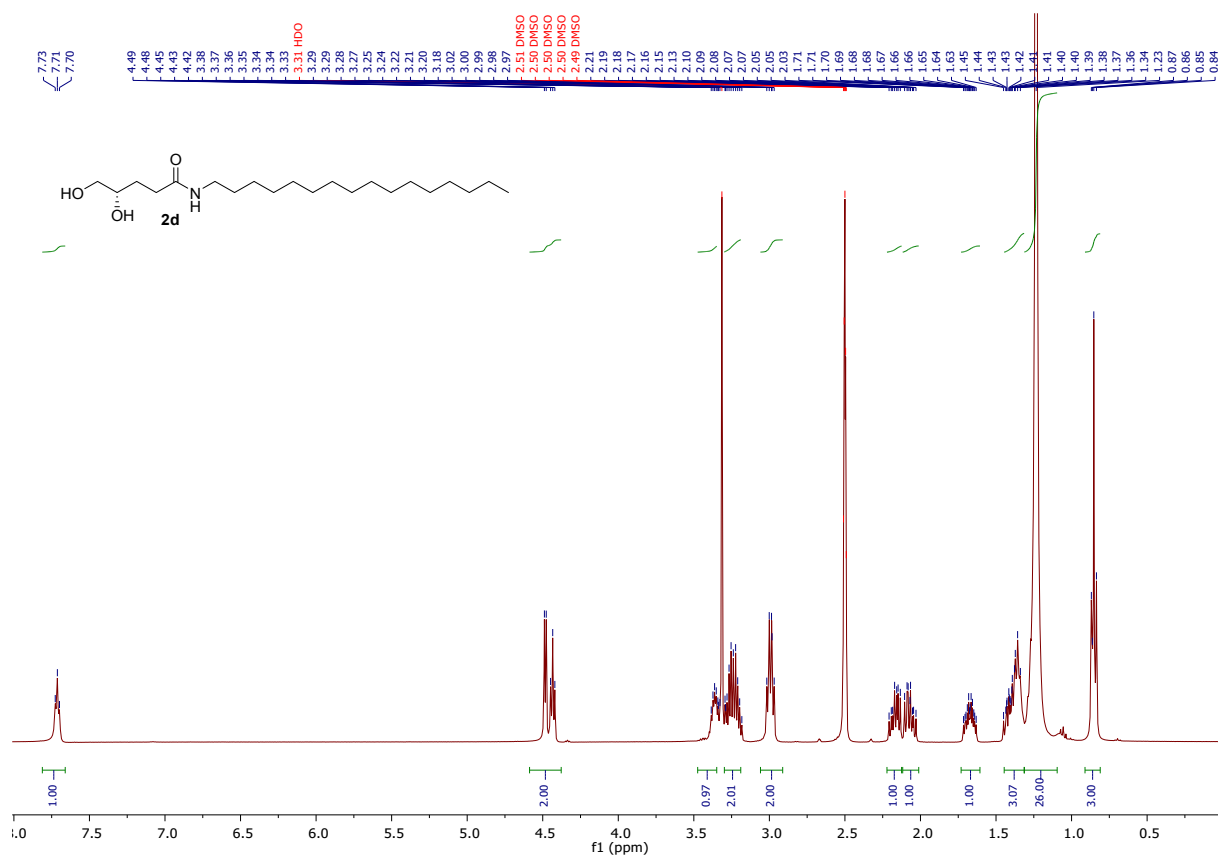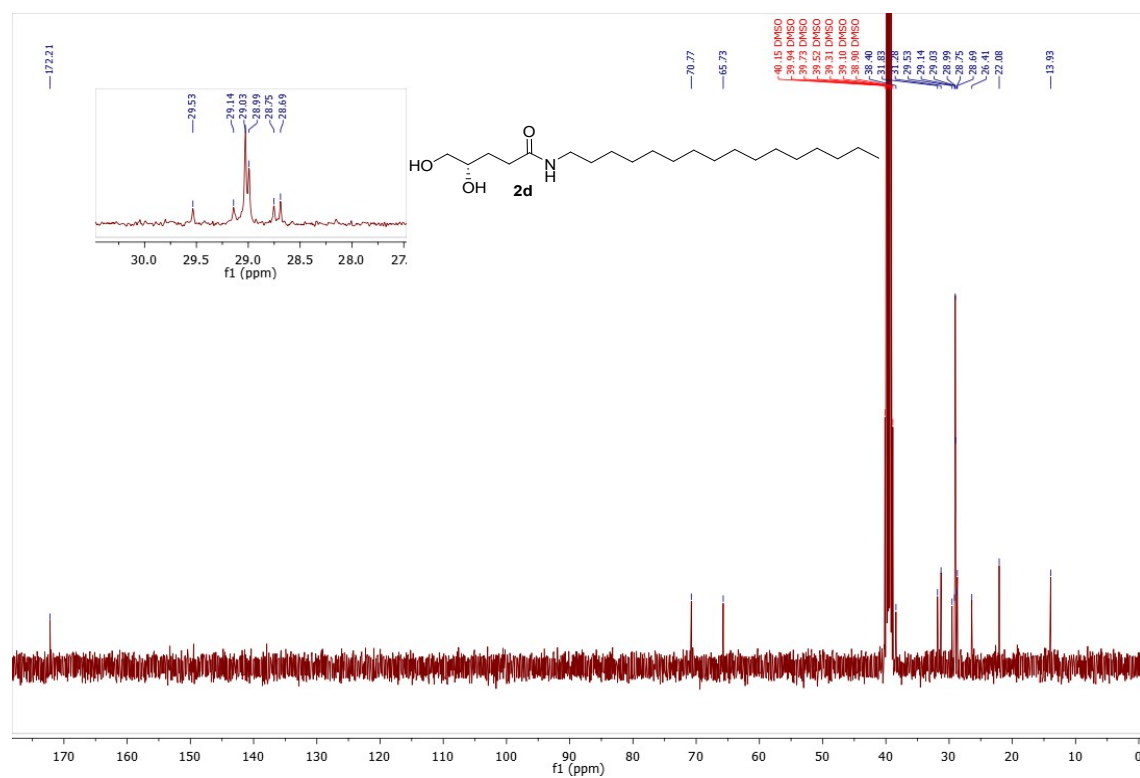

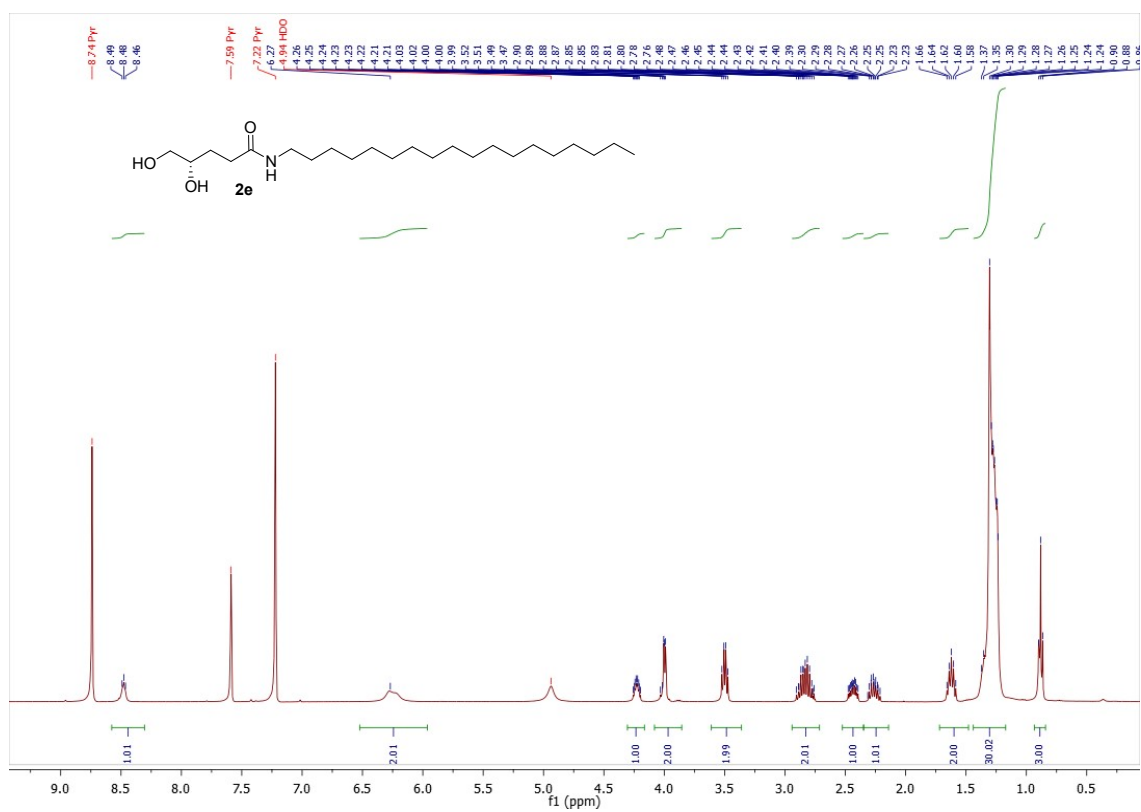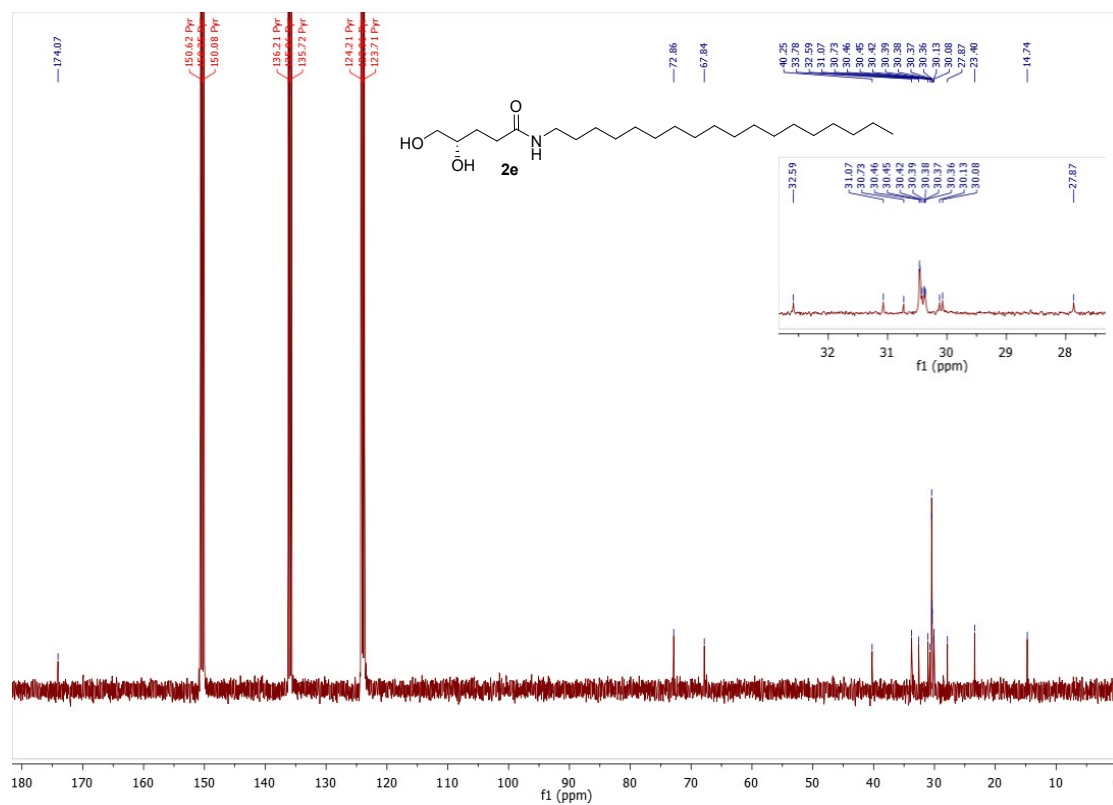



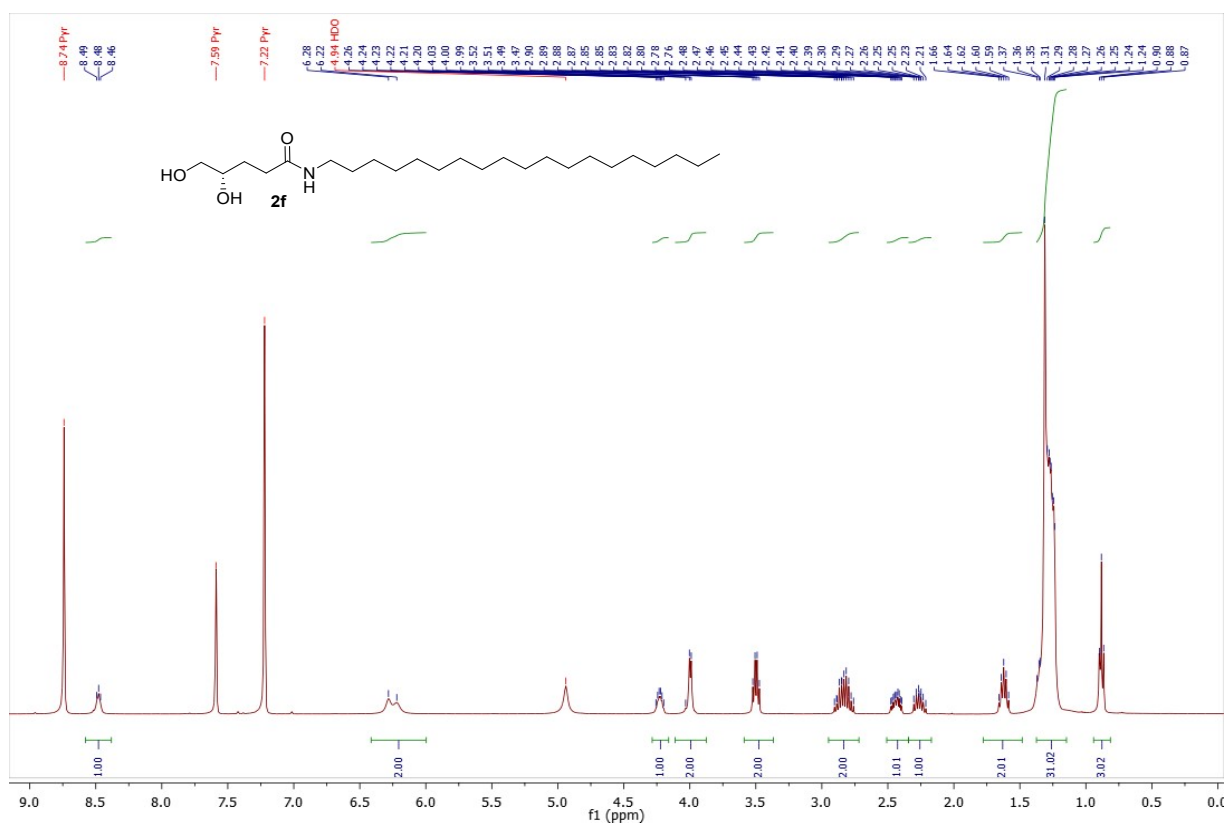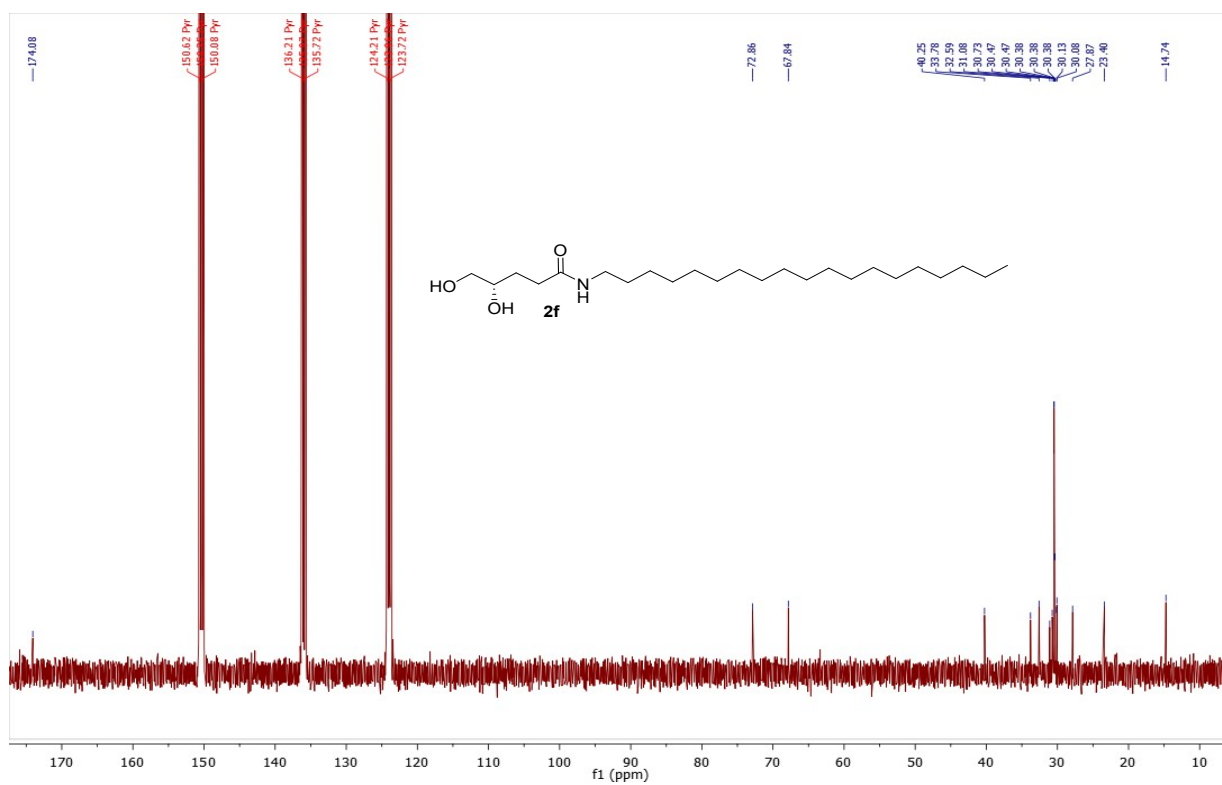

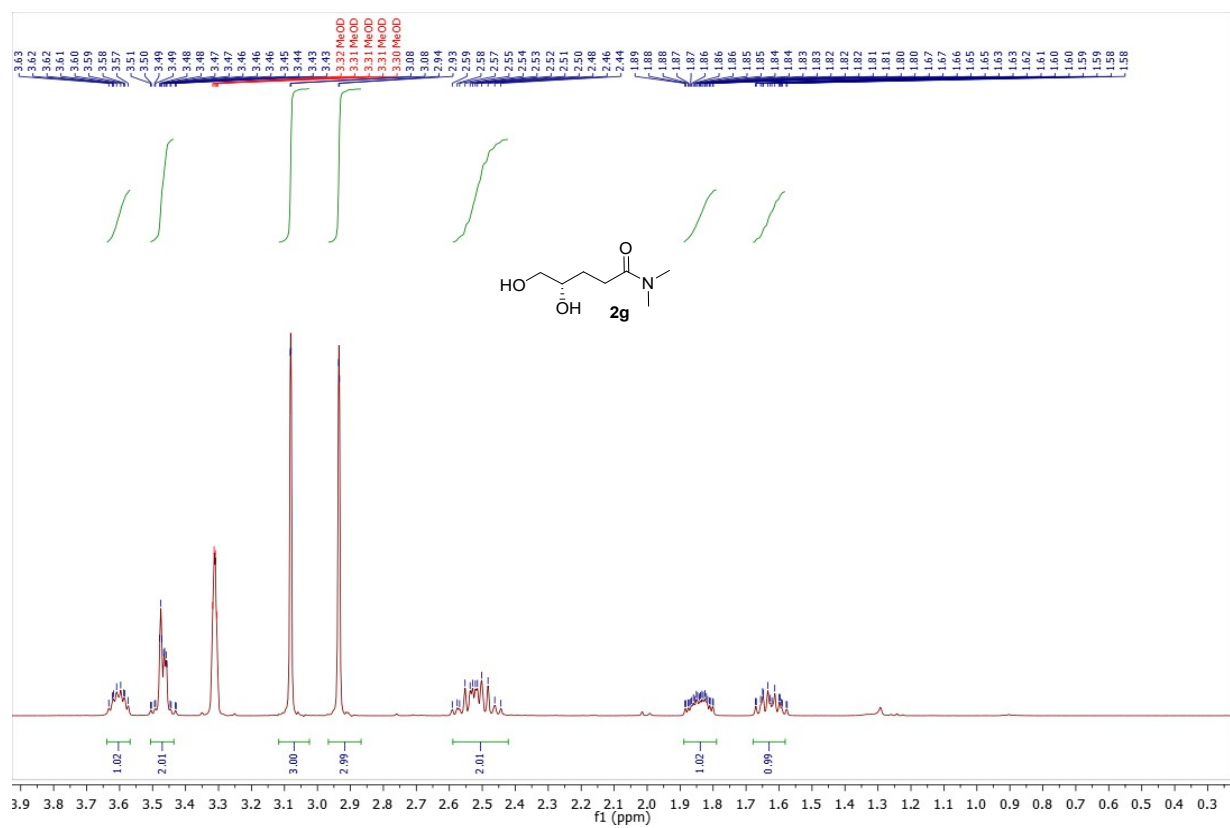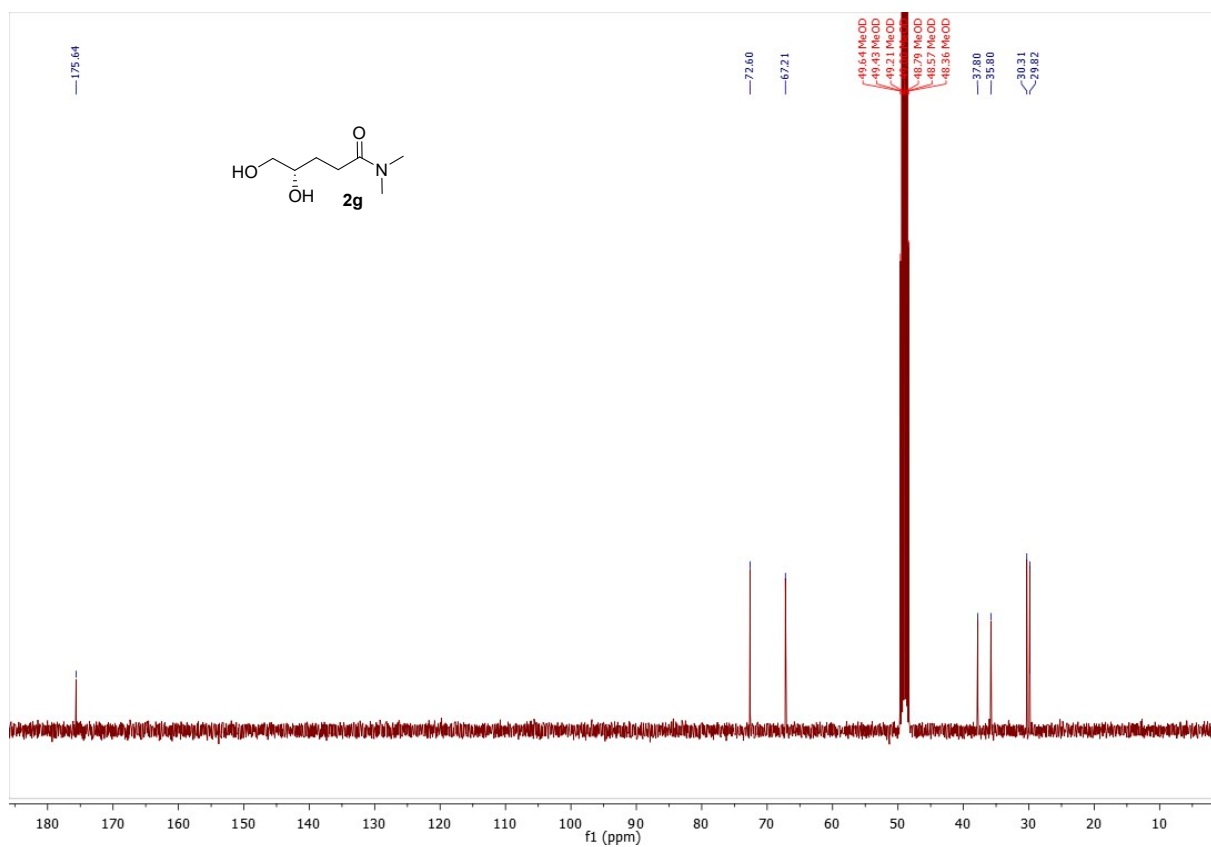

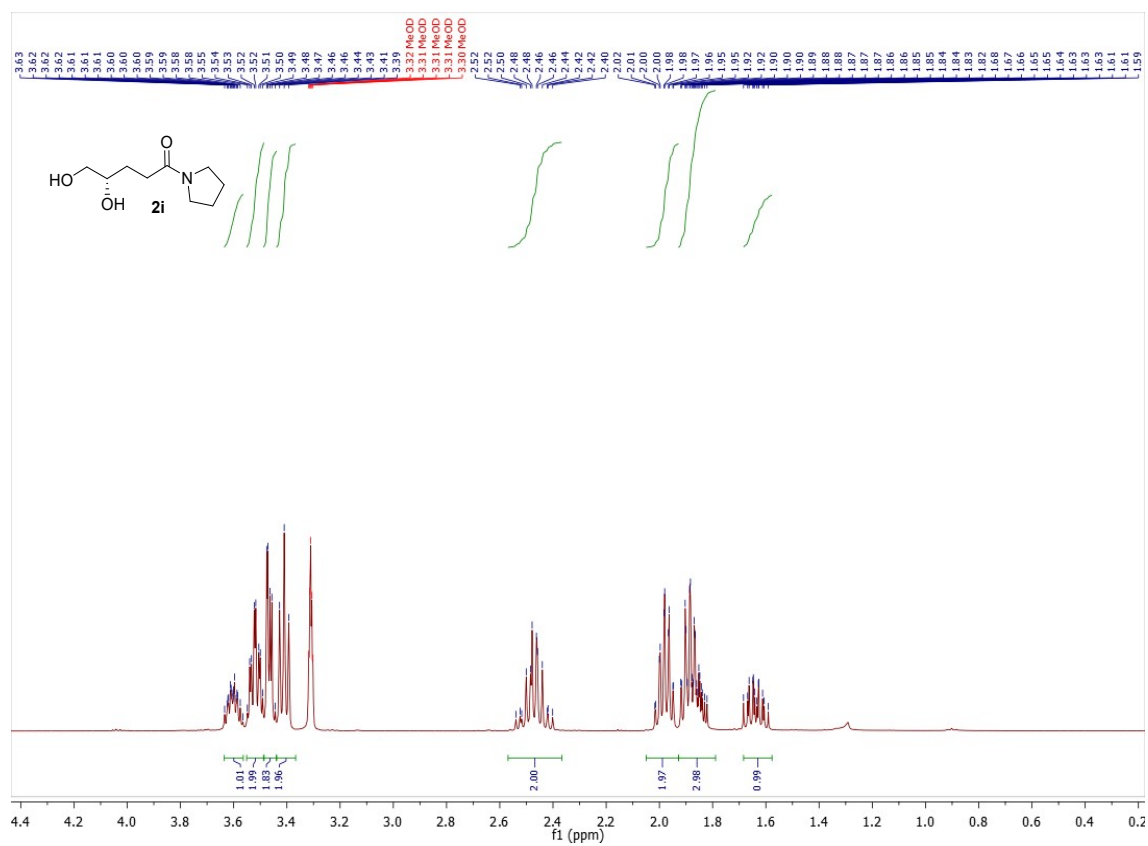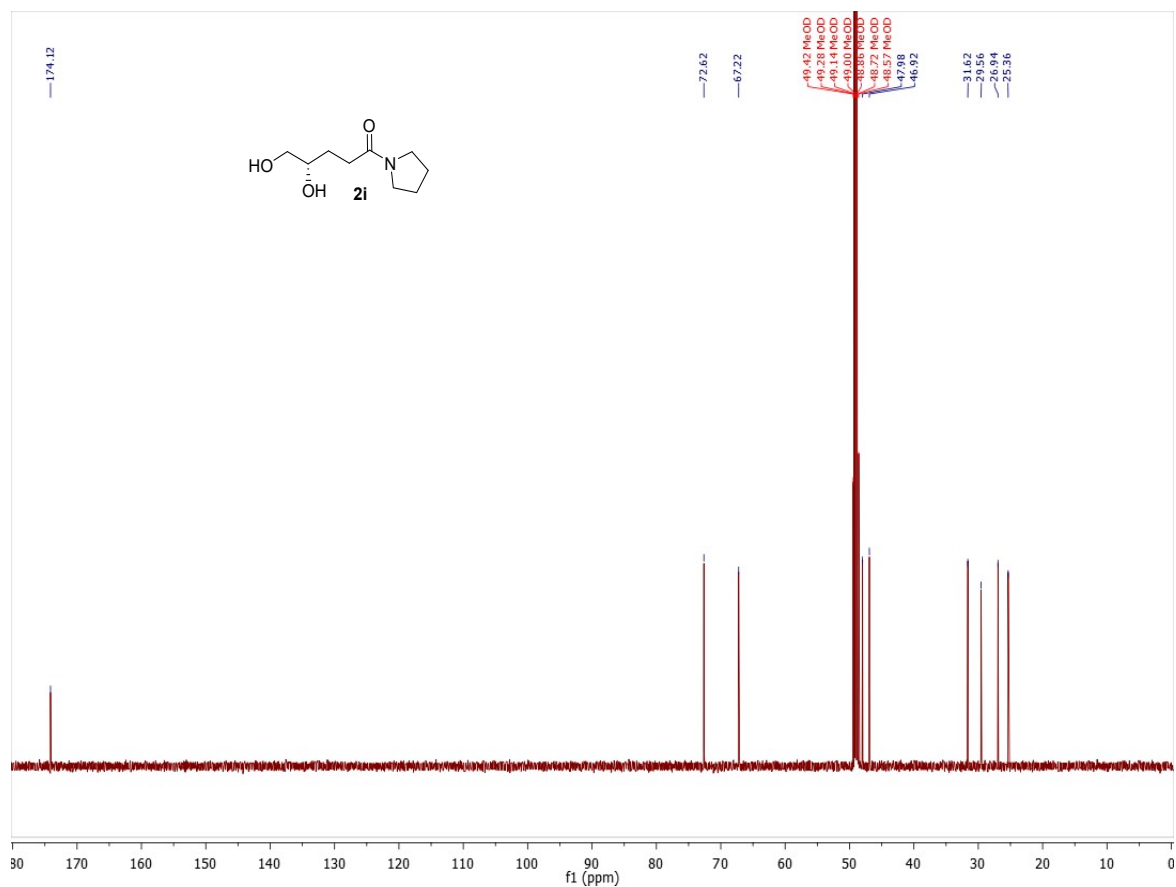

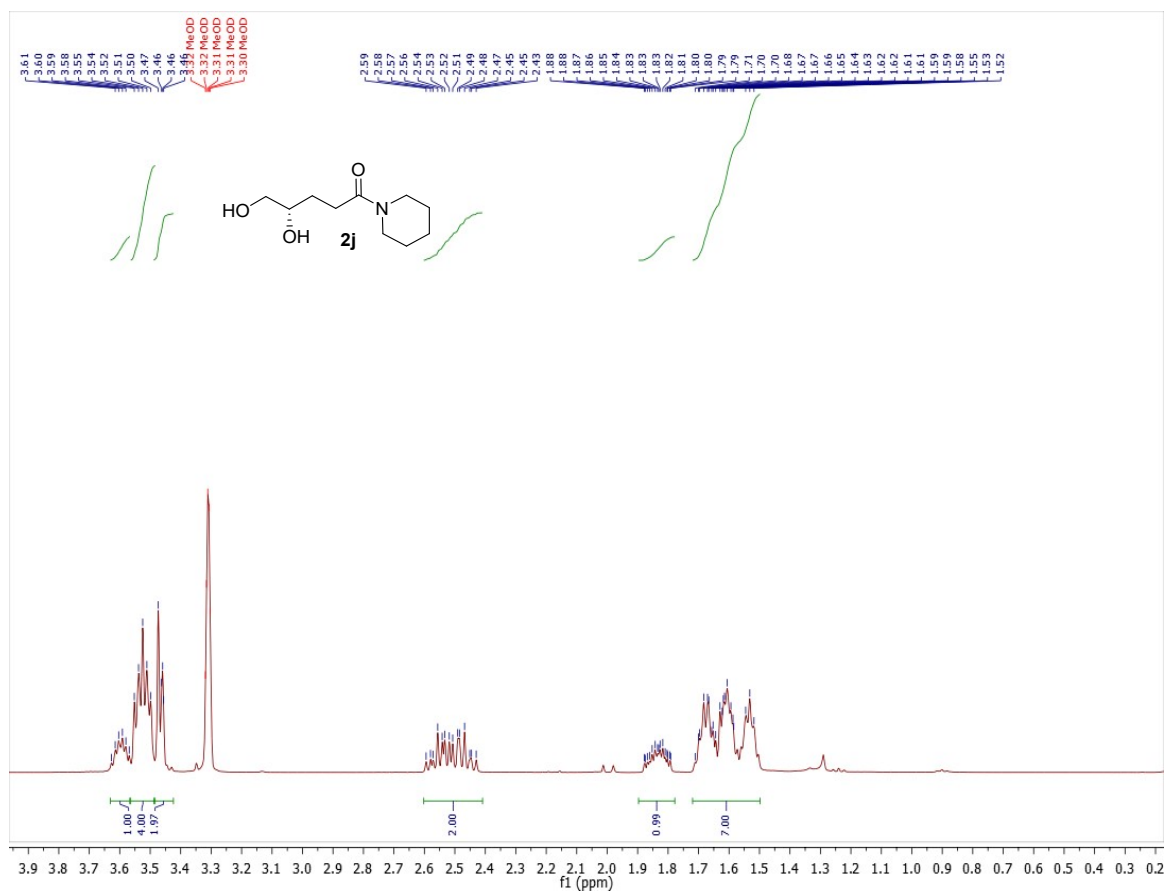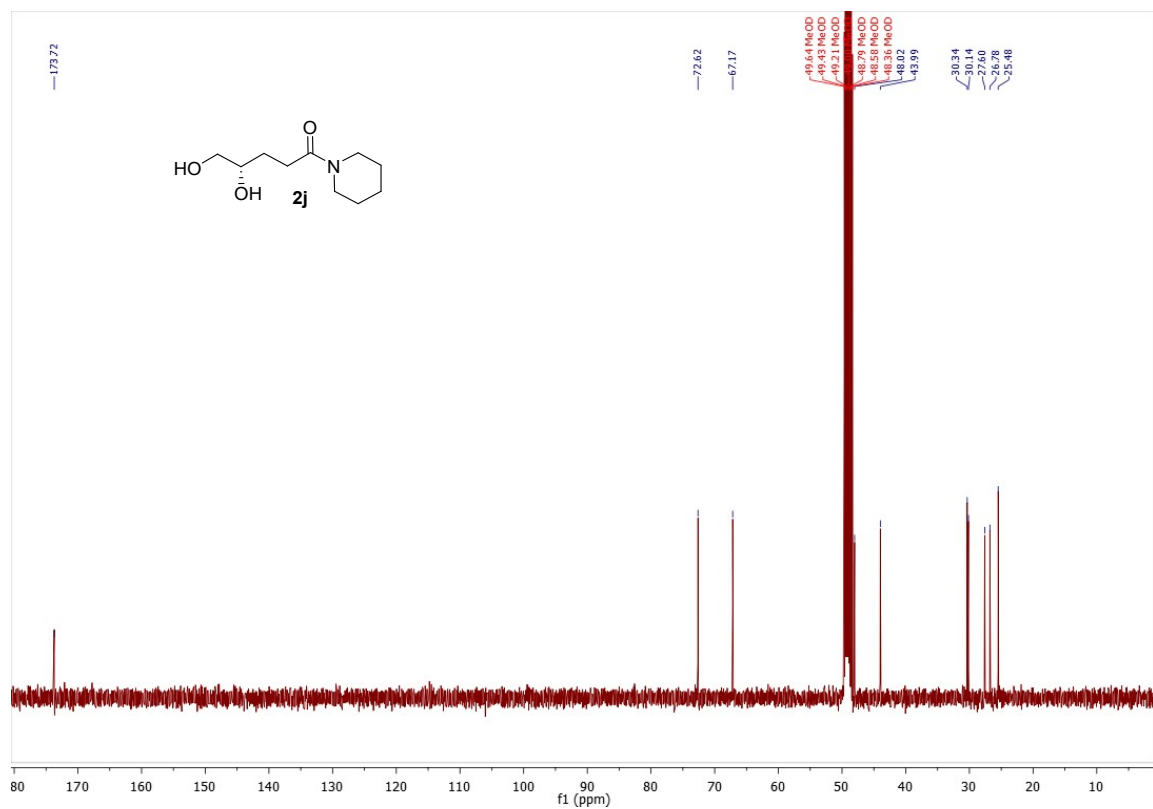

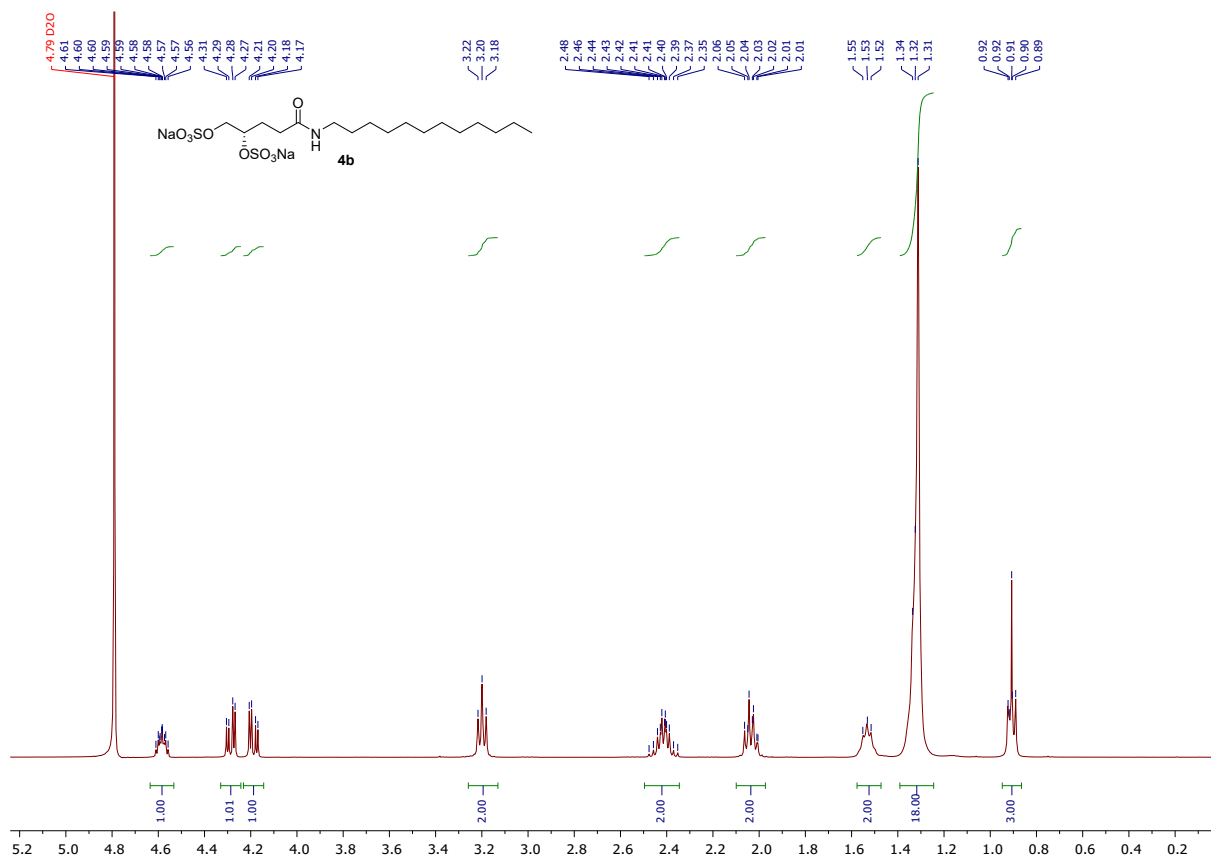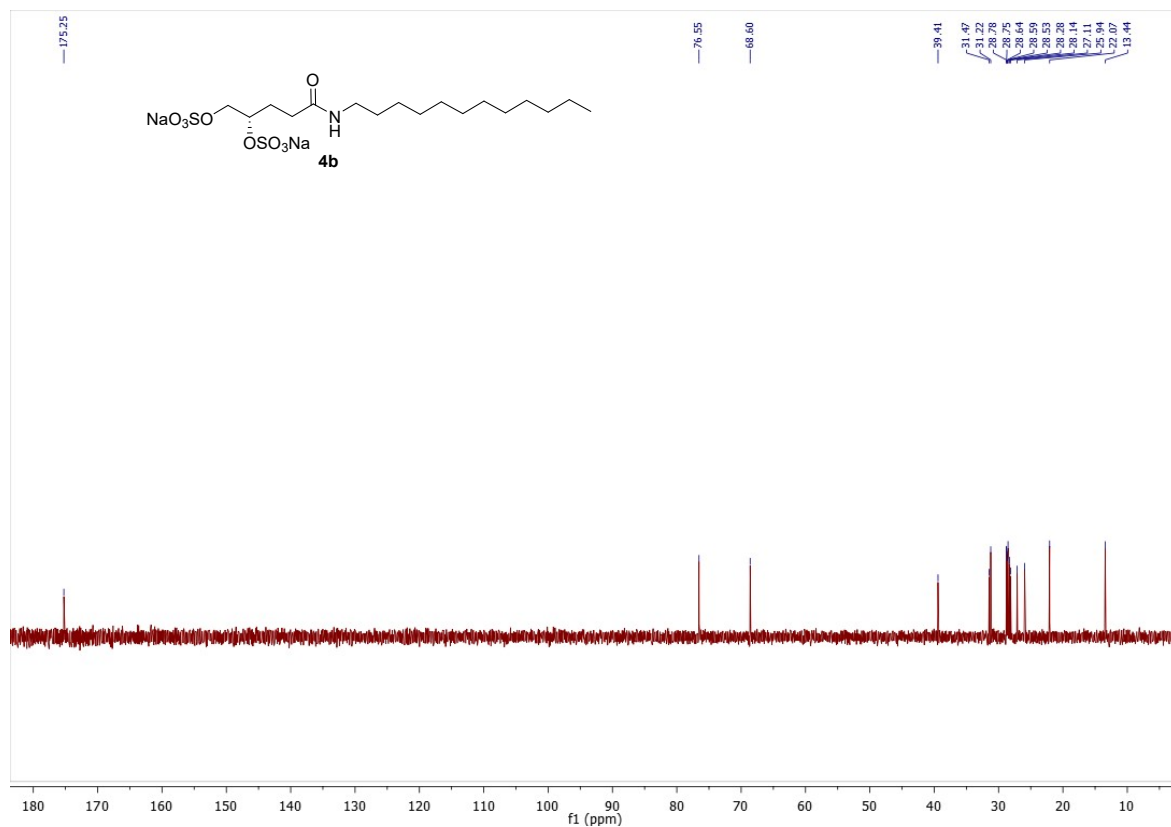

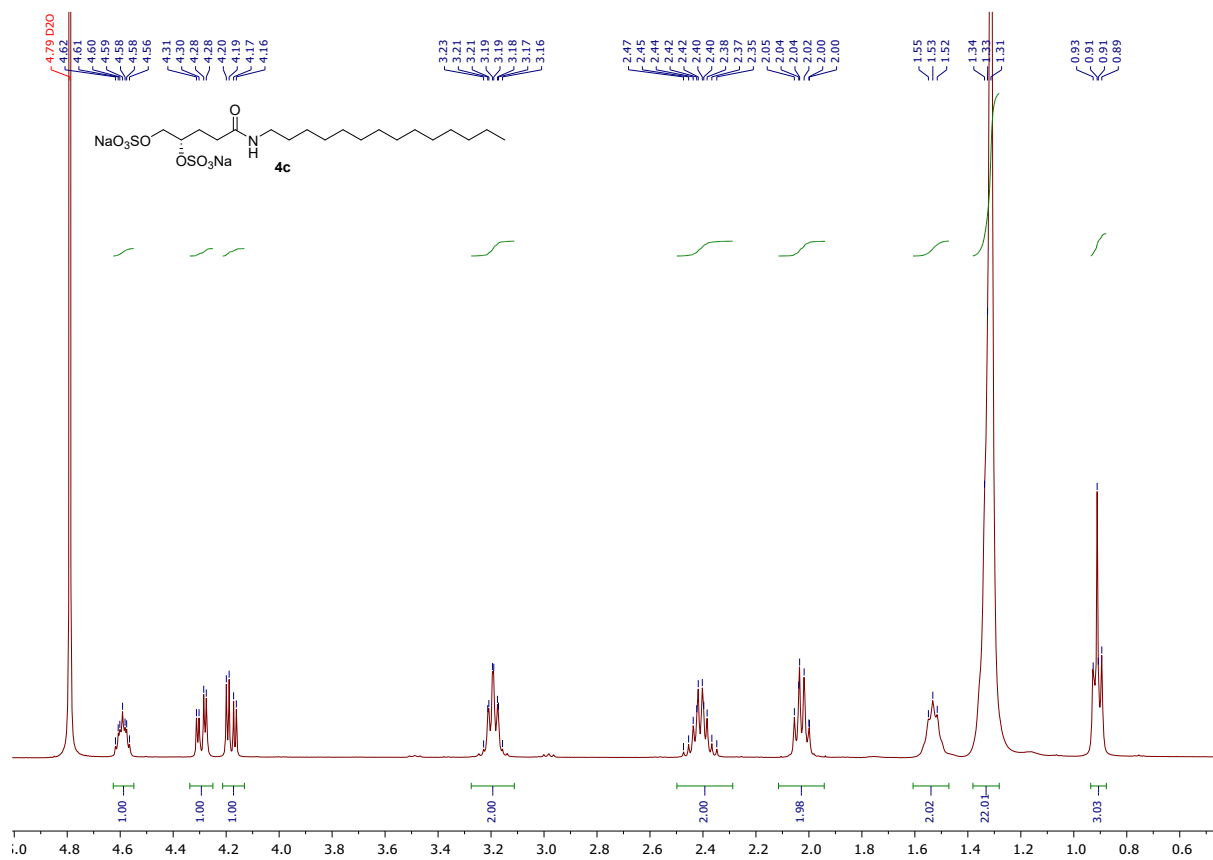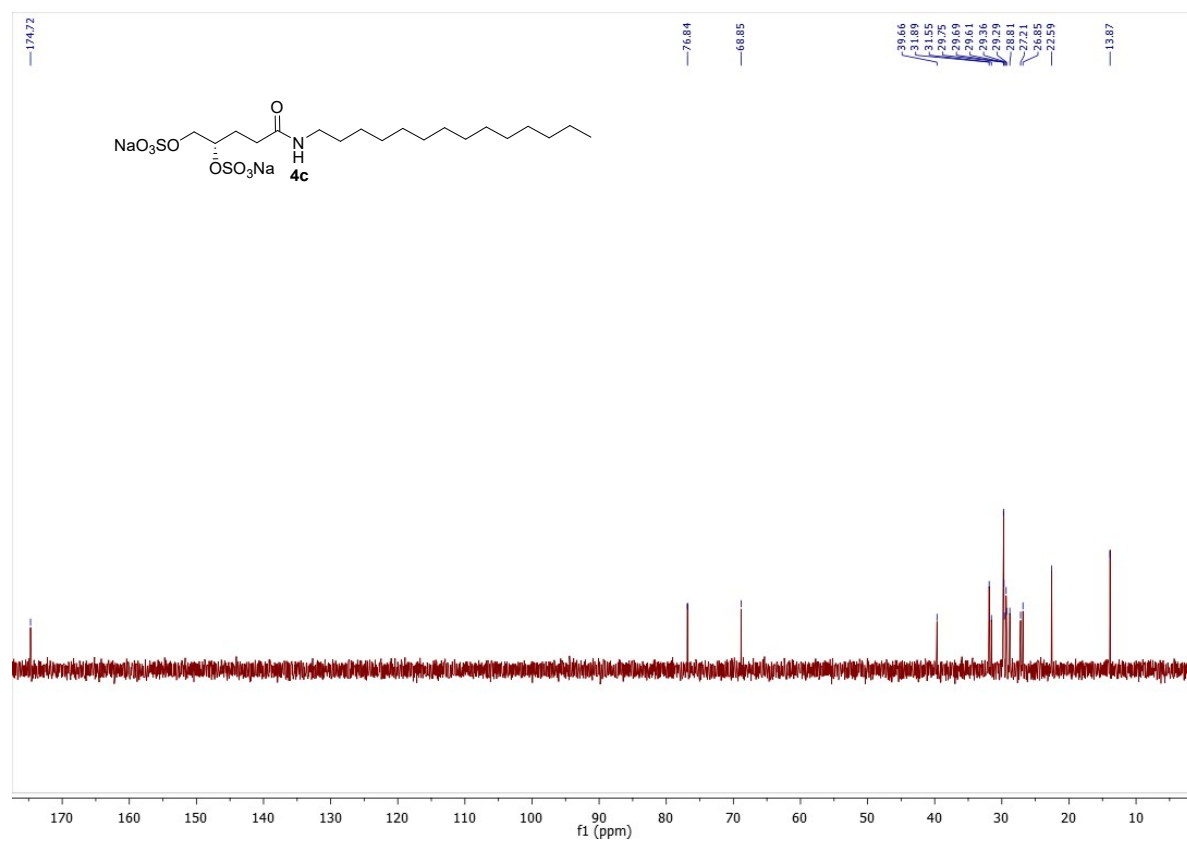

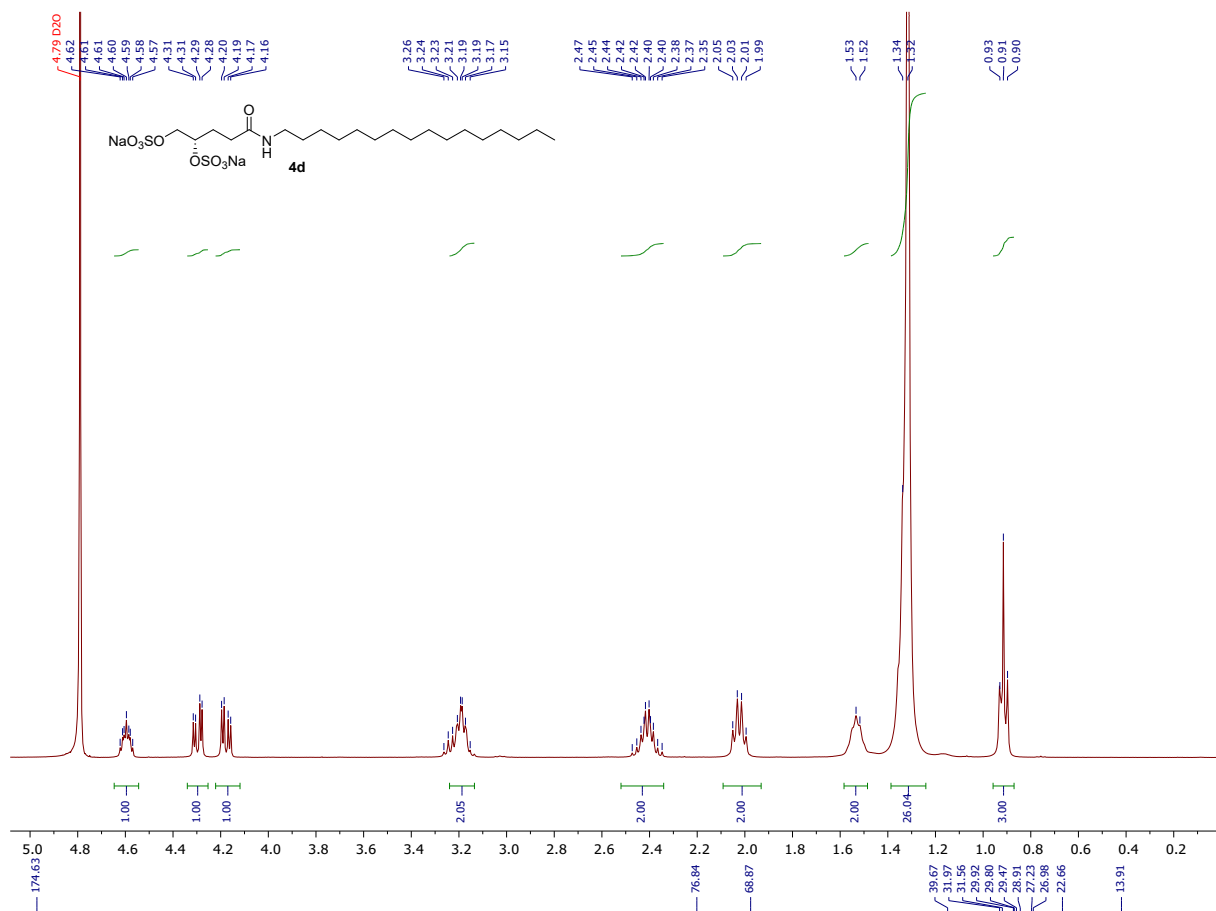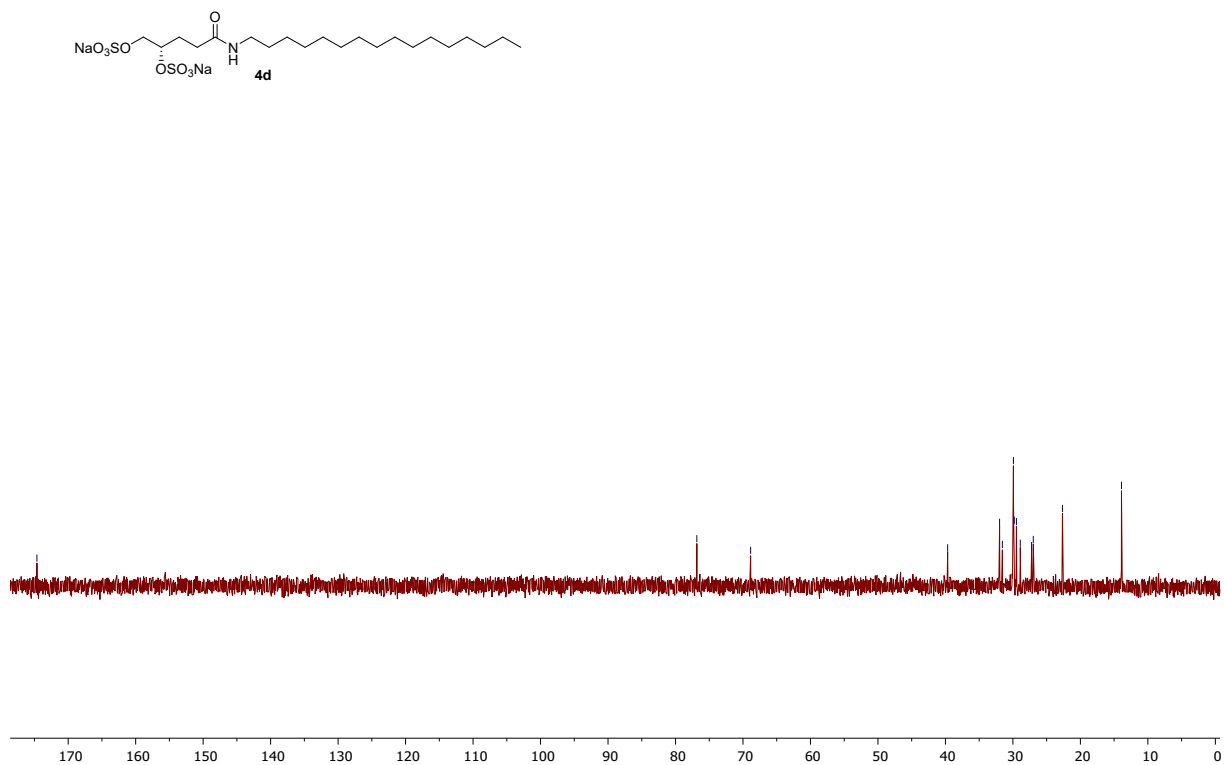

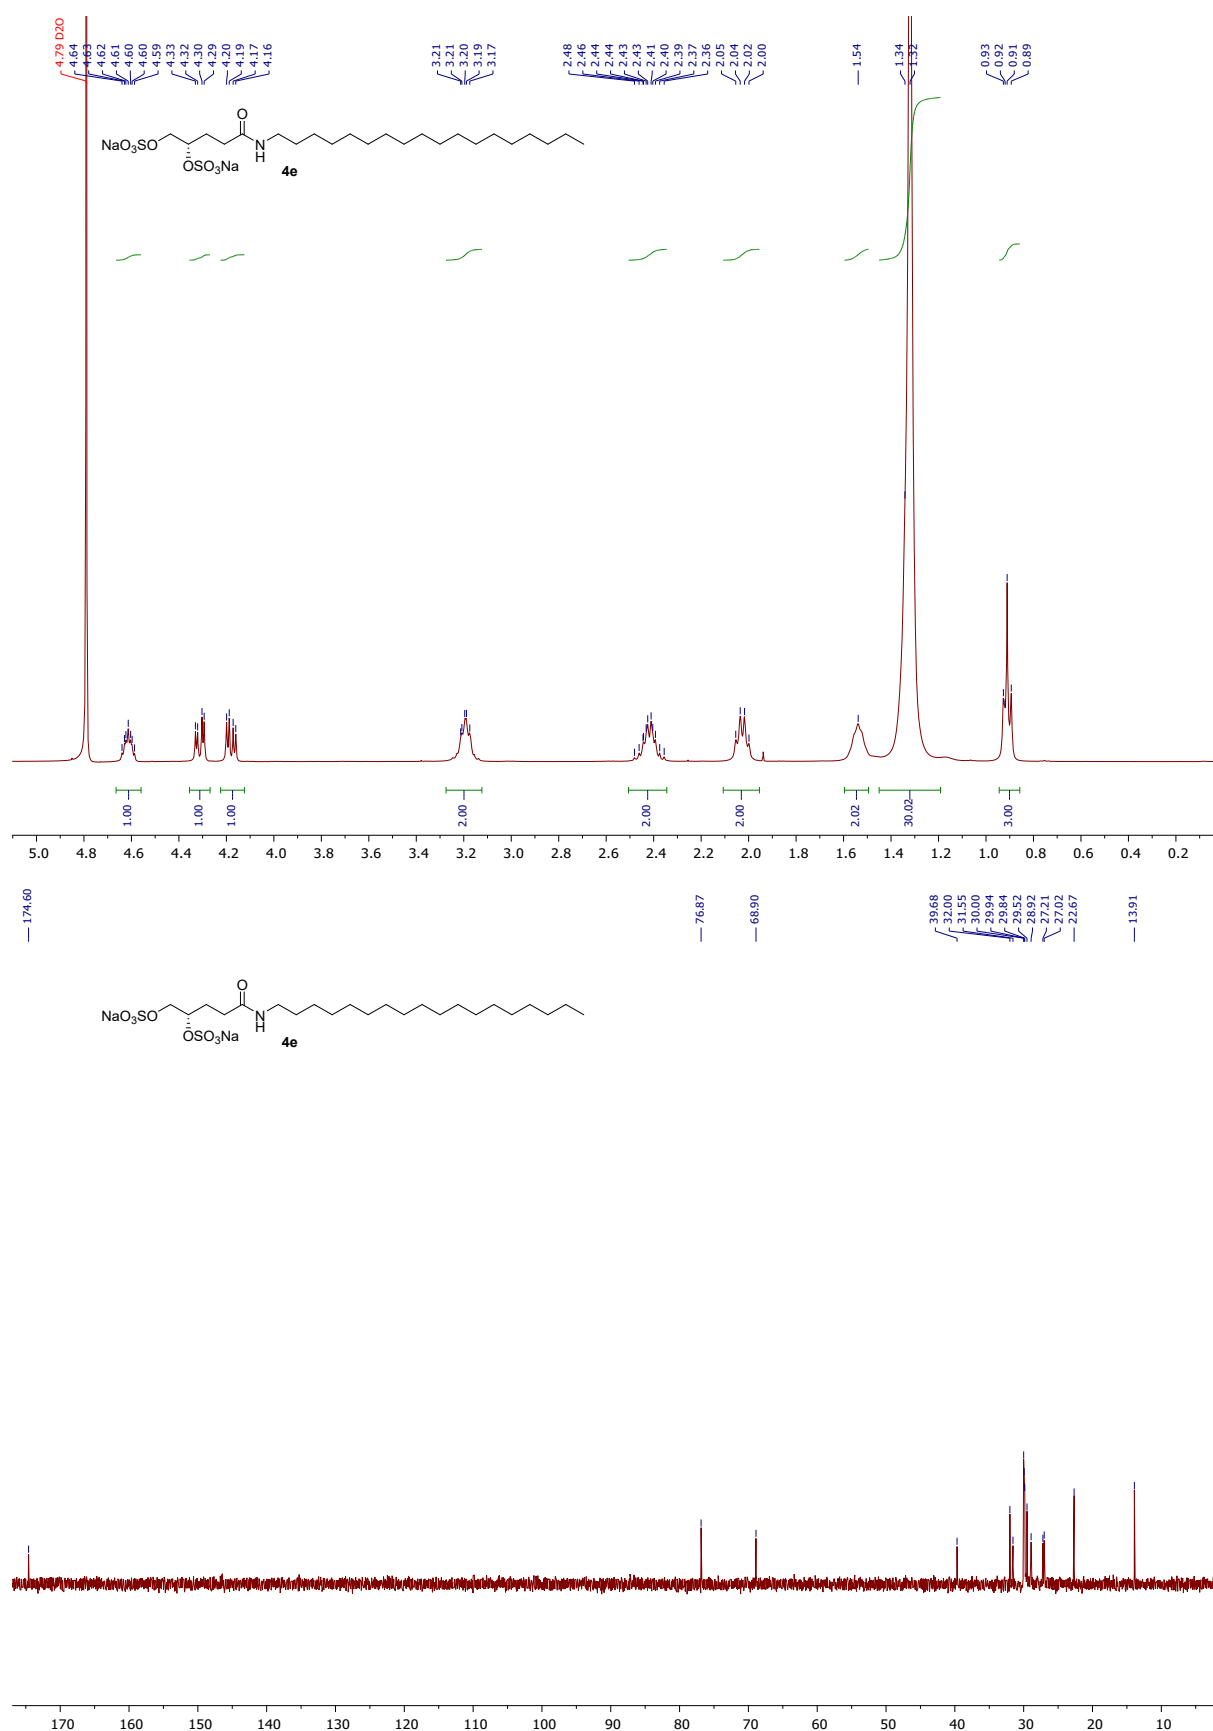

NMR spectra of pure disulfated compound 4e and mixture of mono- and disulfated compounds 3e and 4e



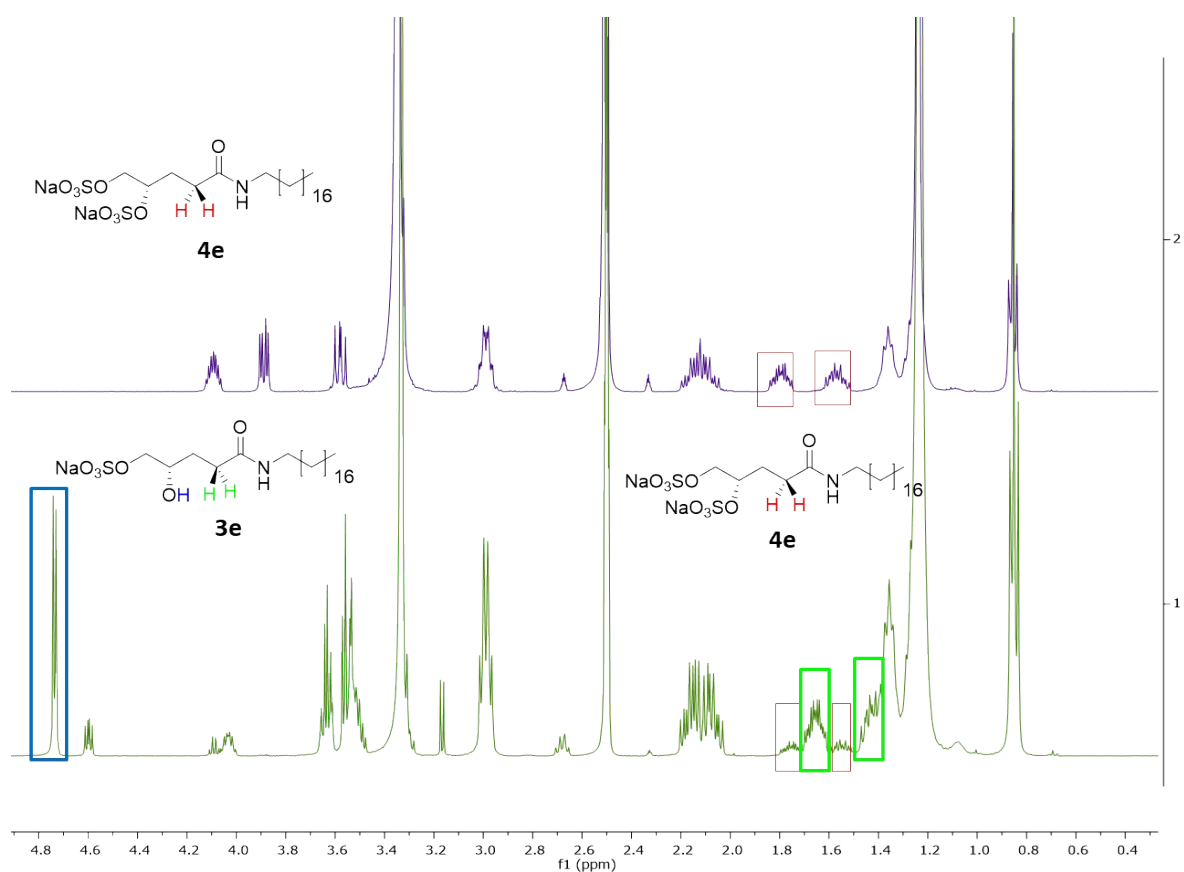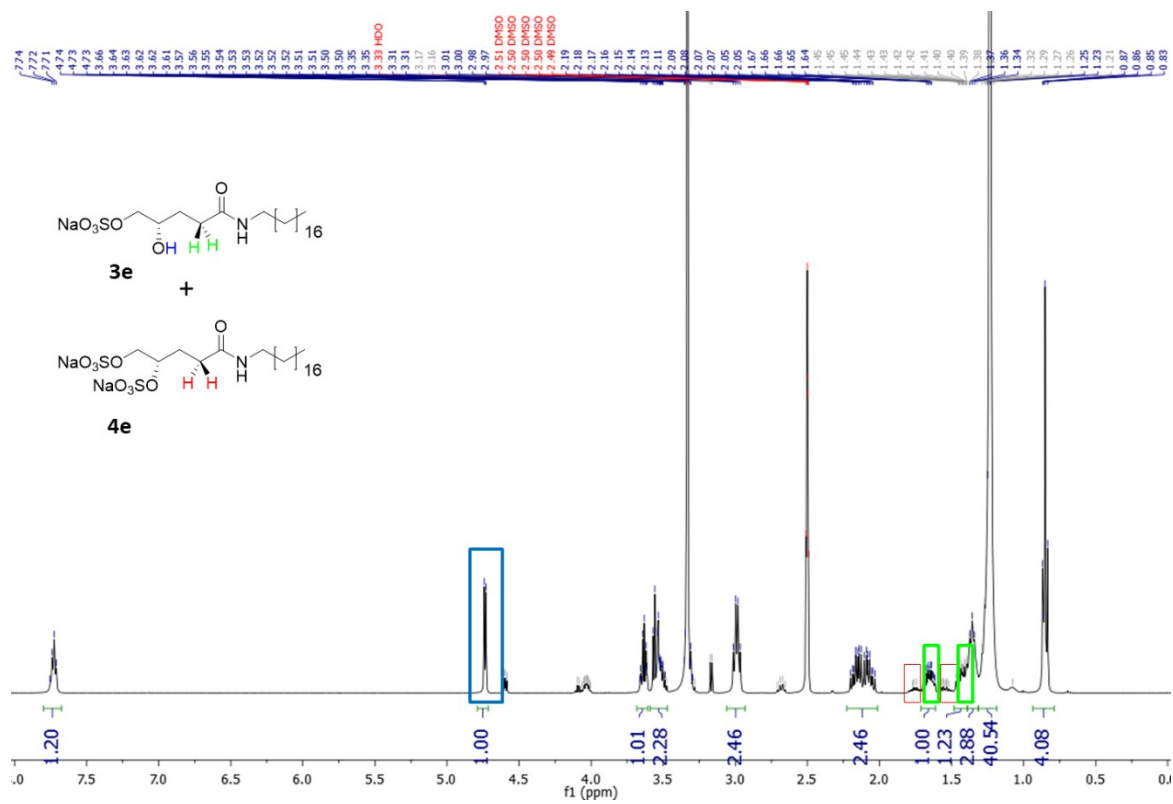

Supplement: d2gc01345b1.pdf [file d2gc01345b1.pdf]
